# 1 **A stochastic model for error correction of kinetochore-microtubule** 2 **attachments and its coupling to the spindle assembly checkpoint**

3  
4 Anand Banerjee<sup>1</sup>, Neil Adames<sup>2</sup>, Jean Peccoud<sup>2</sup> and John J. Tyson<sup>1</sup>

5 <sup>1</sup>Department of Biological Sciences, Virginia Polytechnic Institute & State University,  
6 Blacksburg, VA

7 <sup>2</sup>Department of Chemical and Biological Engineering, Colorado State University, Fort Collins,  
8 USA

9  
10 **Abstract:** To divide replicated chromosomes equally between daughter cells kinetochores must  
11 attach to microtubules emanating from opposite poles of the mitotic spindle. Two mechanisms,  
12 namely, error correction and ‘spindle assembly checkpoint’ work together to facilitate this  
13 process. The error correction mechanism recognizes and detaches erroneous kinetochore-  
14 microtubule attachments, and the spindle assembly checkpoint delays the onset of anaphase until  
15 all the kinetochores are properly attached. Kinases and phosphatases at the kinetochore play a  
16 key role in proper functioning of these two mechanisms. Here we present a stochastic model to  
17 study how the opposing activities of kinases and phosphatases at the kinetochore affect error  
18 correction of kinetochore-microtubule attachments and checkpoint signaling in budding yeast,  
19 *Saccharomyces cerevisiae*. We show that error correction and biorientation of chromosomes  
20 occurs efficiently when the ratio between kinase activity of Ipl1 and the activity of an opposing  
21 phosphatase is a constant (balance point), and derive an approximate analytical formula that  
22 defines the balance point. Analysis of the coupling of the spindle assembly checkpoint signal to

23 error correction shows that its strength remains high when the Ipl1 activity is equal to (or larger  
24 than) the value specified by the balance point, and the activity of another kinase, Mps1, is much  
25 larger (approximately 30 times larger) than its opposing phosphatase (PP1). We also find that the  
26 geometrical orientation of sister chromatids does not significantly improve the probability of  
27 their reaching biorientation, which depends entirely on Ipl1-dependent microtubule detachment.

28  
29 **Author summary:** The kinetochore, the master regulator of chromosome segregation, integrates  
30 signals from different chromosome attachment states to generate an appropriate response, like  
31 the destabilization of erroneous kinetochore-microtubule attachments, stabilization of correct  
32 attachments, maintenance of the spindle assembly checkpoint signal until all kinetochores are  
33 properly attached, and finally silencing of checkpoint when biorientation is achieved. At a  
34 molecular level the job is carried out by kinases and phosphatases. The complexity of the  
35 interactions between these kinases and phosphatases makes intuitive analysis of the control  
36 network impossible, and a systems-level model is needed to put experimental information  
37 together and to generate testable hypotheses. Here we present such a model for the process of  
38 error correction and its coupling to the spindle assembly checkpoint in budding yeast. Using the  
39 model, we characterize the balance between kinase and phosphatase activities required for  
40 removing erroneous attachments and then establishing correct stable attachments between  
41 kinetochore and microtubule. We also analyze how the balance affects the strength of the spindle  
42 assembly checkpoint signal.

43

44

## 45 **Introduction**

46 Equal partitioning of duplicated chromosomes is crucial for maintaining genetic integrity from  
47 one generation to the next. A key step in this process is the attachment of kinetochores (KTs) on  
48 sister chromatids to microtubules (MTs) emanating from opposite poles of the mitotic spindle.  
49 The attachment process is stochastic and error prone, resulting in erroneous attachments like  
50 syntely (where both KT's are attached to the same spindle pole) and merotely (where one KT is  
51 attached to both spindle poles) (see Fig 1). Such errors must be corrected before the onset of  
52 anaphase (1-3). The correction of erroneous KT-MT attachments in budding yeast is crucially  
53 dependent on the kinase Ipl1 (3-5).

54  
55 The Ndc80 complex at the KT is a primary site for KT-MT attachment (6, 7). Phosphorylation of  
56 Ndc80 by Ipl1 weakens its interaction with MTs (7-9) and conversely, its dephosphorylation  
57 increases its affinity for MTs and stabilizes KT-MT attachments (10). In tensionless KT's (which  
58 is the case in unattached, syntelic and monotelic KT's), Ipl1 phosphorylates Ndc80, resulting in  
59 dissociation of Ndc80-MT interactions. This provides the unattached KT an opportunity to attach  
60 to a new MT from the correct spindle pole (1, 3, 4). Together, these observations suggest that a  
61 balance between kinase and phosphatase activities is required to break erroneous attachments  
62 and then establish correct, stable attachments between KT and MT (11-13). Experiments show  
63 that PP1 phosphatase (Glc7 is the PP1 catalytic subunit in budding yeast) opposes the kinase  
64 activity of Ipl1 (14-16), but whether it dephosphorylates Ndc80 or not and its importance in  
65 biorientation of chromosomes remains unclear.

66

67 The process of error correction is also coupled to a surveillance mechanism called the spindle  
68 assembly checkpoint (SAC). Unattached KTs, generated during error correction, initiate SAC  
69 signaling (17, 18). Briefly, unattached KTs recruit a kinase, Mps1, to phosphorylate Spc105  
70 (Kn11 in mammalian cells) at phosphodomains called MELTs (Met-Glu-Leu-Thr sequence).  
71 Phosphorylated MELTs then bind to cytoplasmic SAC proteins to turn on the SAC signal (19).  
72 The SAC monitors KT-MT attachments and delays the onset of anaphase until all KTs are  
73 properly attached (17, 20). After biorientation is achieved, the SAC needs to be turned off to  
74 allow cells to proceed to anaphase. KTs recruit phosphatases PP1 and PP2A (Pph21/22 are the  
75 PP2A catalytic subunits in yeast) to silence the SAC in a timely manner (21-23). Almost all the  
76 proteins involved in error correction and the SAC are conserved in yeast and humans. However,  
77 yeast KTs are smaller than mammalian KTs and attach to only one MT (24).

78  
79 The activities of these kinases and phosphatases are coupled to each other. For example, Ipl1 and  
80 PP2A activities control the binding of PP1 to KTs, and the attachment of Ndc80 to a MT blocks  
81 its Mps1 binding sites (25, 26). Existing models on error correction are coarse-grained and do  
82 not take into account the complexity of interactions between the kinases and phosphatases at the  
83 KT (27, 28). They also do not account for how SAC signaling is coupled to the error correction  
84 process. To fill this gap, in this paper we present (in the context of budding yeast cells) a new  
85 systems-level, stochastic model to track the time evolution of the number of molecules of kinases  
86 and phosphatases bound to the KT, the phosphorylation states of their substrates, and the number  
87 of SAC proteins bound to the KT. We study how the opposing activities of kinases and  
88 phosphatase affect error correction in KT-MT attachments and the activity of the SAC. We also

89 calculate the relative contributions of Ipl1-dependent destabilization of KT-MT attachments and  
90 the geometrical orientation of KTs towards reaching biorientation.

91

## 92 **Model**

93 The scheme in Fig 1 shows the possible transitions between different attachment states for a pair  
94 of budding yeast KTs at the centromere of a replicated chromosome. Initial attachment of a KT  
95 to a MT occurs with the lateral surface of the MT – known as lateral attachment. The lateral  
96 attachment is then converted into end-on attachment by sliding of the KT on the MT. To simplify  
97 this process, we assume that the first interaction between KT and MT is an end-on attachment.  
98 In our model, the amphitelic state has the KTs attached to MTs from opposite poles of the  
99 mitotic spindle but the centromere is not yet under tension. The amphitelic state can transition  
100 reversibly to the monotelic state (only one KT attached to the spindle) or irreversibly to the  
101 biorientation state in which the KTs are attached to opposite poles and there is tension between  
102 the KTs. Tension is generated by the opposing forces exerted by depolymerizing MTs bound to  
103 KTs. Tension stretches the centromeric region of the chromosome and is thought to stabilize KT-  
104 MT attachments by physically separating Ipl1 from its substrates and thereby reducing its role in  
105 destabilizing KT-MT attachments (29, 30). We assume that Ipl1 activity behaves like a step  
106 function: in the amphitelic state, Ipl1 activity remains high, which allows the possibility of  
107 detachment of a MT, and in biorientation state it drops to zero. Hence, the probability of going  
108 from the biorientation state to the amphitelic state is zero. The criterion used to define the  
109 transition from the amphitelic to biorientation state is described later.

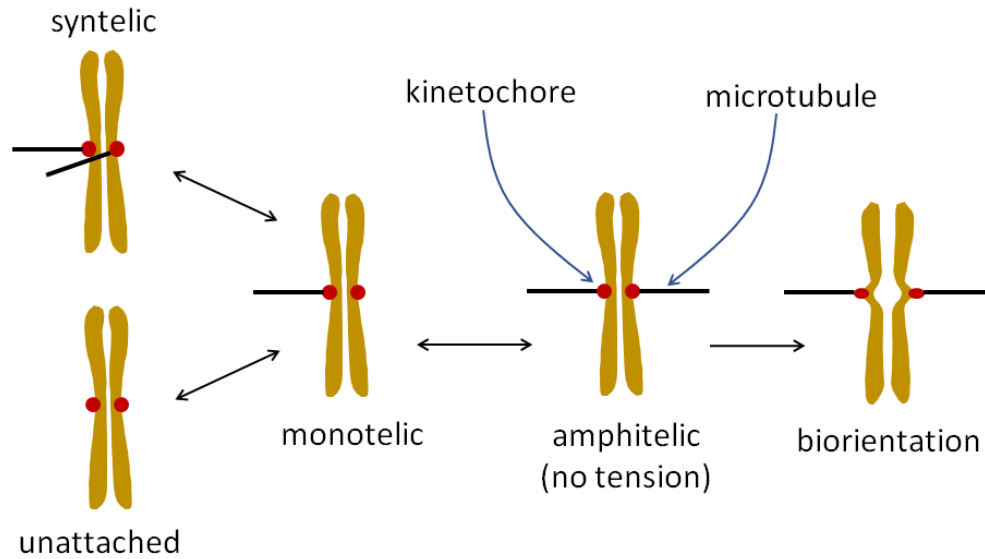

110

111 **Fig 1. Model for transitions of sister chromatids between different KT-MT attachment states.** Double-headed  
112 arrows denote reversible transitions, whereas the single-headed arrow denotes the irreversible transition from the  
113 amphitelic to the biorientation state.

114

115 The actions of kinases and phosphatases at the KT to control error correction and SAC activity,  
116 as described above, is shown schematically in Fig. 2. The main kinases are Ip11 and Mps1, and  
117 the phosphatases are PP1, PP2A, and PPX (an unknown phosphatase). Ip11 phosphorylates  
118 Ndc80 and the RVSF motif on Spc105 (8, 16). Phosphorylation of RVSF prevents its binding to  
119 PP1. Mps1 kinase phosphorylates MELT repeats on Spc105 to activate SAC signaling (22).  
120 PP2A dephosphorylates the RVSF motif, allowing PP1 to bind to Spc105 and dephosphorylate  
121 its MELT repeats. At this point in time, it is not clear which phosphatase dephosphorylates  
122 Ndc80; hence, 'PPX' in Fig. 2. Possible candidates for PPX are the free PP1 and PP2A in the  
123 nucleus.

124

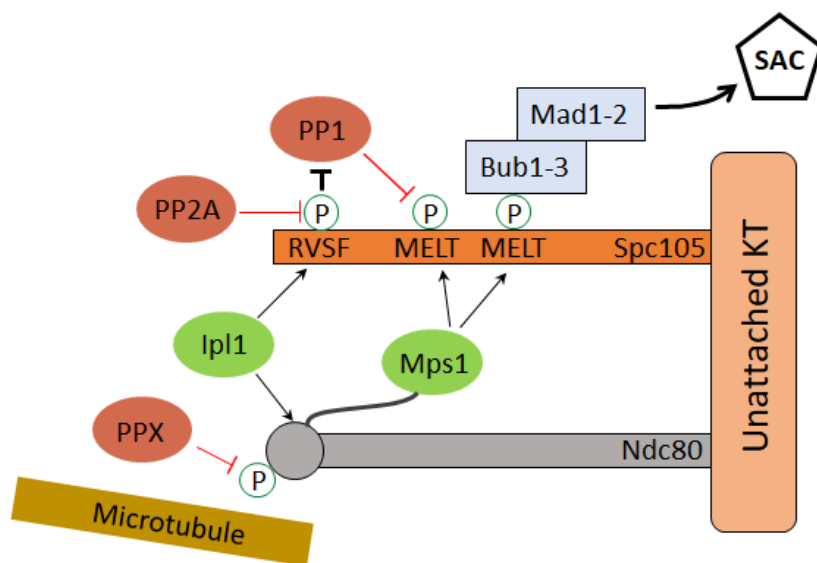

125  
126 **Fig 2. Scheme for kinase and phosphatase activities at the KT.** Kinases are Ipl1 and Mps1 (shown in green), and  
127 phosphatases are PP1, PP2A, and PPX (shown in red). Phosphorylation of MELT motifs by Mps1 starts the SAC  
128 signaling cascade. Phosphorylation of Ndc80 by Ipl1 weakens KT-MT attachment, and phosphorylation of RVSF by  
129 Ipl1 prevents binding of PP1. PP2A dephosphorylates RVSF to promote binding of PP1 to Spc105.  
130 Dephosphorylation of Ndc80 by PPX promotes KT-MT attachment, and dephosphorylation of MELT motifs by PP1  
131 promotes silencing of the SAC signal.

132  
133 The scheme shown in Fig. 2 can be understood as three coupled modules, namely, the Ndc80  
134 module, the RVSF module, and the MELT module. These modules and the coupling between  
135 them are shown in Fig. 3A. The Ndc80 module consists of two phosphorylation states and two  
136 Mps1-binding states. Ipl1 phosphorylates Ndc80 at multiple sites to modulate its interactions  
137 with MTs (8); to keep the model simple we assume only two phosphorylation states. Attachment  
138 of a MT to Ndc80 is diagrammed separately (Fig. 3B). A budding yeast KT contains five Ndc80  
139 molecules (31). The unknown phosphatase PPX dephosphorylates Ndc80, which promotes its  
140 binding to MTs.

141

142 The RVSF module contains different phosphorylation states and PP1-binding states of the RVSF  
143 motif on Spc105. By phosphorylating RVSF, Ipl1 prevents PP1 binding to this motif. PP2A  
144 opposes Ipl1 by dephosphorylating RVSF. There are five Spc105 molecules per KT (32), and  
145 one RVSF motif on each Spc105.

146

147 A third module contains different phosphorylation states and Bub-binding states of the six  
148 MELT motifs on Spc105 (32); i.e., 30 MELT motifs on each KT. This module is crucial for  
149 generation of the SAC signal. Mps1 phosphorylates MELT motifs and PP1 dephosphorylates  
150 them. In reality, phosphorylated MELT repeats bind Bub3-Bub1, and then phosphorylation of  
151 Bub1 by Mps1 allows binding of Mad1-Mad2 (33). The Mad1-Mad2 complex acts as template  
152 for generation of the Mitotic Checkpoint Complex (MCC), a diffusible signal that delays onset of  
153 anaphase by inhibiting the Anaphase Promoting Complex/Cyclosome (APC/C; a ubiquitin  
154 ligase) (34). We simplify this signaling cascade by lumping the SAC proteins into a single  
155 species called Bub, and assume that the state MELTP:BubP is capable of generating the MCC.  
156 The SAC signal is turned off by the dissociation of BubP from MELTP, and after dissociation  
157 BubP is dephosphorylated to Bub by some unknown phosphatase.

158

159 Coupling between the modules is shown with dashed arrows. Mps1 bound to either Ndc80 or  
160 Ndc80P phosphorylates the MELT repeats on Spc105, and PP1 bound to RVSF  
161 dephosphorylates MELT repeats. We assume that all substrates at the KT are accessible to their  
162 corresponding enzymes. For example, an Mps1 molecule bound to Ndc80 can phosphorylate all  
163 the available MELT repeats (30 of them), and the same holds true for Ipl1, PP2 and PP1 and  
164 their substrates.



165

166

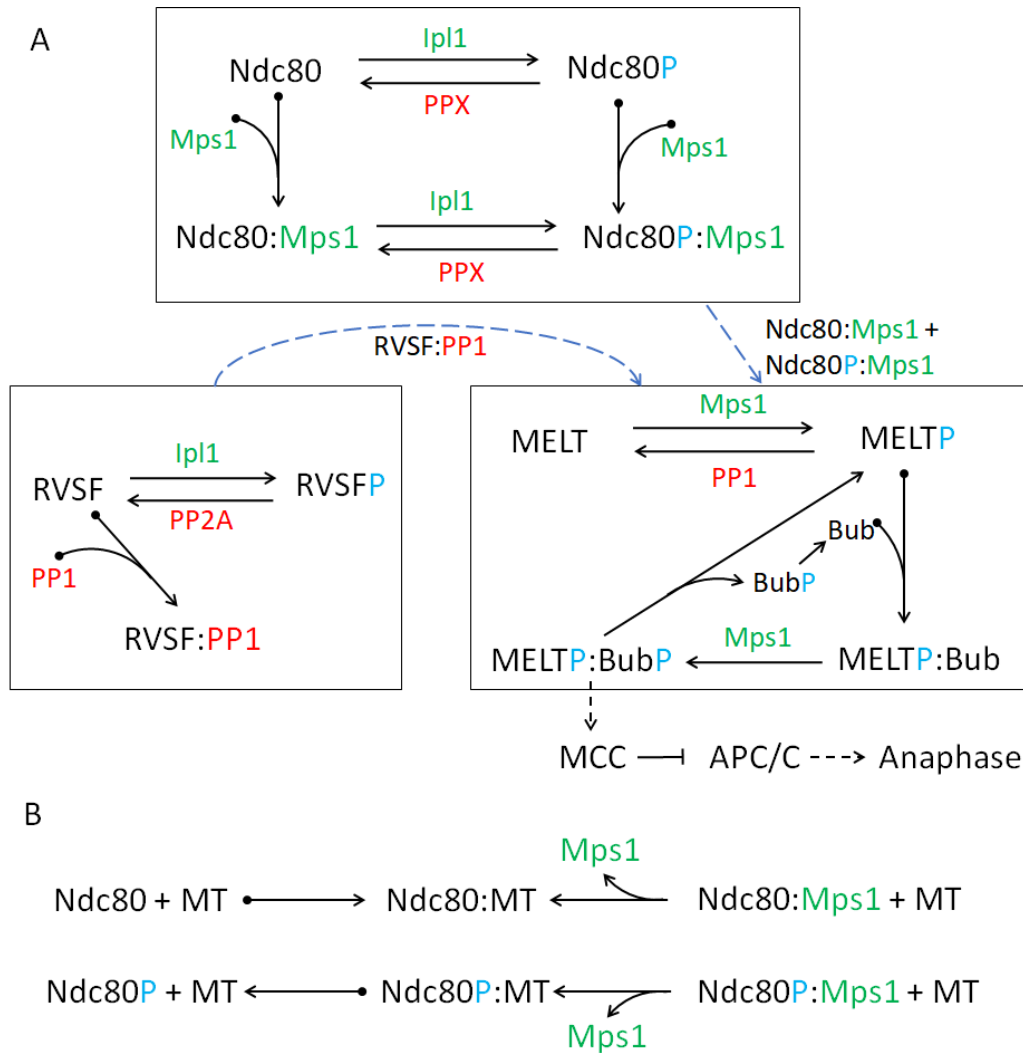

167

168 **Fig 3. Molecular interactions at the KT.** (A) Model of kinase (green) and phosphatase (red) activities at the KT,  
 169 derived from the scheme in Fig. 2. The full scheme can be divided into three modules (shown within boxes),  
 170 namely, Ndc80, MELT, and RVSF modules. See text for a detailed description of each module. ‘P’ (blue color) is  
 171 used to depict the phosphorylation status of different motifs. Dashed arrows between the boxes show that Mps1  
 172 bound to either Ndc80 or Ndc80P phosphorylates MELT repeats, and PP1 bound to RVSF dephosphorylates them.  
 173 (B) Scheme showing binding of Ndc80 to MT. The reactions on the first line show that Ndc80 (unphosphorylated)  
 174 binds strongly to a MT, stabilizing the attachment, and Ndc80:Mps1 can also bind to a MT, which displaces Mps1 in  
 175 an irreversible reaction. (MTs and Mps1 compete for the same binding site on Ndc80, therefore, upon MT binding

176 Mps1 is removed from Ndc80.) We assume that Ndc80P (and Ndc80P:Mps1) can also bind to MTs (second line of  
177 reactions), but with a much larger dissociation constant, i.e., phosphorylation of Ndc80 promotes detachment of the  
178 MT from a KT.

179

180 Our model for attachment of Ndc80 to a MT is shown in Fig. 3B. KT-MT attachment is a  
181 complex process involving both the Ndc80 complex and the Dam1 complex (35). We focus only  
182 on the Ndc80 complex and assume that both phosphorylated and unphosphorylated forms of  
183 Ndc80 bind to a MT, and that the dissociation rate of Ndc80P:MT is much larger than that of  
184 Ndc80:MT, consistent with the observation that the affinity of Ndc80 for MTs decreases with the  
185 number of phosphorylations (9). It is also known that MTs and Mps1 compete for the same  
186 binding site on Ndc80 (25, 26). In our model, Mps1 is removed from Ndc80 upon MT binding.

187

### 188 **Kinetochores-Microtubule attachment dynamics**

189 As mentioned earlier, in budding yeast, a MT attaches to a KT via Ndc80. To model the  
190 attachment dynamics we describe the attachment state of sister KTs by a two-dimensional vector  
191  $(m, n)$ , where the integers  $m$  and  $n$  correspond to the number of Ndc80s bound to a MT at each  
192 KT of a sister chromatid pair. Figure 4A shows the attachment dynamics of sister KTs. The  
193 symbols ‘s’ (red) and ‘a’ (green) correspond to syntelic and amphitelic attachments, respectively.  
194 A double arrow between states reflects that transitions can occur in both forward and backward  
195 directions. Figure 4B shows different realizations of the KT-MT attachment status as a function  
196 of time, calculated using the scheme in Fig. 4A. All the traces start in the syntelic attachment  
197 state and end in biorientation but, as shown later, in certain cases the KTs fail to reach  
198 biorientation.

199

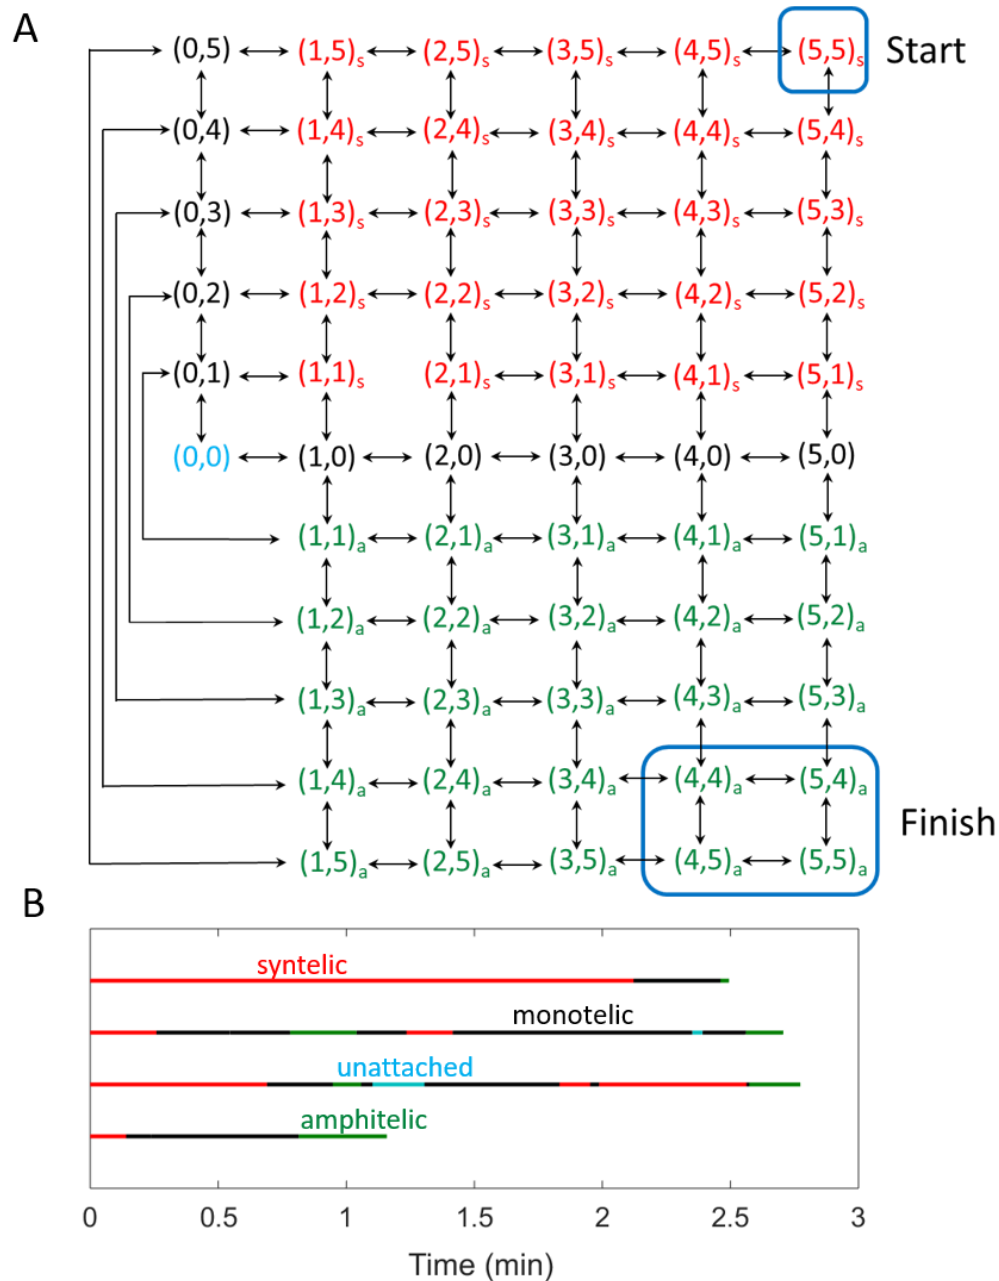

**Fig 4. (A) A model of MT attachment to sister KTs through Ndc80.** The vector  $(m, n)$  represents the number of Ndc80s bound to a MT at each KT. The attachment can be monotelic (black), syntelic (red with subscript s) or amphitelic (green with subscript a). The start and finish points of chromosome-alignment process are shown with blue boxes. We assume that the process stops (KTs reach biorientation) when the KT's spend more than 1 sec in the

206 finish box without coming out. **(B)** Traces showing time-development of KT-MT attachment status calculated using  
207 the scheme in (A).

208  
209 Since we are interested in understanding the dynamics of error correction, we choose that KTs  
210 start in a syntelic attachment state  $(5,5)_s$ . This is reasonable as syntelic attachments are frequently  
211 observed during early mitosis in budding yeast (1, 2). As mentioned earlier, sister KTs attached  
212 to MTs from opposite spindle poles (i.e., amphitelic attachments) come under tension when the  
213 MTs exert forces (due to MT depolymerization) simultaneously on both KTs of a centromere.  
214 The typical time for such an event to occur has been estimated to be  $\sim 1$  second (27). Thus, we  
215 assume that the amphitelic attachments come under tension when four or more Ndc80s (i.e.,  
216  $Ndc80+Ndc80P \geq 4$ ) are bound to the MTs on each side of a centromere for more than one  
217 second. In other words, the irreversible amphitelic-to-biorientation transition occurs when the  
218 system spends more than one second in the states  $(4,4)_a$ ,  $(5,4)_a$ ,  $(4,5)_a$ ,  $(5,5)_a$ , without coming out.

219  
220 For KTs in monotelic states (black color in Fig. 4), attachment of a MT to the unattached KT can  
221 be either amphitelic or syntelic (see Fig. 1). This attachment is a stochastic process that depends  
222 on factors like the rotational diffusion of sister chromatids in the monotelic state. We don't  
223 account for the detailed motion of the chromosomes. Instead, we take a coarse-grained approach,  
224 introducing a parameter,  $P_{syn}$ , to specify the ratio of transitions between monotelic  $\rightarrow$  syntelic and  
225 monotelic  $\rightarrow$  amphitelic states. For example,  $P_{syn} = 0.5$  corresponds to the case where the KTs in  
226 monotelic state are equally likely to form syntelic or amphitelic attachments. Lower values of  
227  $P_{syn}$  ( $< 0.5$ ) corresponds to the case where KTs in a monotelic state are biased towards forming  
228 amphitelic attachments.

229

## 230 **Simulation**

231 We prepared the model in an Excel file which contains the list of species, initial conditions,  
232 reactions corresponding to Ndc80, RVSF, MELT modules and KT-MT attachment, reaction-  
233 propensities, parameter values, and constraints. We wrote a MATLAB code which takes the  
234 Excel file as input and outputs another MATLAB file containing the stoichiometric matrix and  
235 the propensity vector, which were used to prepare the code for Gillespie Stochastic Simulation of  
236 the model. The Excel and MATLAB files are provided in the online Supporting Information (SI).  
237 We stopped the simulation when one of the following two criteria was satisfied: (1) KTs reached  
238 biorientation, (2) time in simulation reached 10 mins. In budding yeast, the time interval between  
239 prometaphase to anaphase is approximately 15 mins (36). During that time the KTs must get  
240 bioriented and the SAC signal in the cytoplasm must be turned off (takes ~ 5 min). Thus 10 mins  
241 for reaching biorientation is a reasonable choice.

242  
243 From our simulations we calculated the probability of biorientation within 10 min, fraction of  
244 time spent by KTs in different attachment states, average number of transitions between different  
245 states, and quantities related to SAC signal. The method used to calculate these quantities is  
246 described in SI. We performed 10000 stochastic simulations to calculate the statistics for  
247 different sets of parameter values. To study the case where formation of syntelic attachment is  
248 less probable than formation of amphitelic attachment the value of  $P_{\text{syn}}$  was chosen to be 0.1.  
249 Reducing  $P_{\text{syn}}$  to values smaller than 0.1 did not change the results significantly.  $P_{\text{syn}} = 0.5$  was  
250 chosen to study the case where formation of syntelic and amphitelic attachments are equally  
251 probable. The activities of kinase and phosphatase are defined as (number of  
252 molecules) $\times$ (corresponding rate constant). For example, Ipl1 activity =  $Ipl1 \times k_{ipl1}$ . In our

253 analysis we keep the number of molecules of Ipl1, PPX, PP2A constant (all equal to one), and  
254 change their activities by changing their corresponding rate constant.

255

## 256 **Results**

### 257 **Kinase-phosphatase balance during error correction**

258 Here we explore how Ipl1 and PPX activities affect the probability of biorientation. For this  
259 analysis we use the Ndc80-MT attachment model shown in Fig. 4 and choose  $P_{\text{syn}} = 0.1$ . First,  
260 we determine what happens in the absence of kinase and phosphatase activities. To this end, we  
261 set phosphorylation/dephosphorylation rate of Ndc80 by Ipl1/PPX to zero ( $k_{\text{ipl1}} = k_{\text{ppx}} = 0$ ) and  
262 calculate the dependence of biorientation probability on  $k_{\text{ndc}}$ , the Ndc80:MT dissociation rate.  
263 In this case  $k_{\text{ndc1}}$  (Ndc80P:MT dissociation rate) becomes unimportant because the Ndc80s  
264 start in the unphosphorylated state and are never phosphorylated. We find that biorientation  
265 probability attains a peak value of one at  $k_{\text{ndc}} = 0.7 \text{ sec}^{-1}$  (Fig. 5). Thus, if the dissociation rate  
266 is properly tuned then error correction and biorientation (within 10 mins) can, in principle, occur  
267 even in the absence of kinase and phosphatase activities.

268

269 Since Ipl1 activity is required for error correction (3-5), the value of  $k_{\text{ndc}}$  is probably less than  
270  $0.7 \text{ sec}^{-1}$ . Indeed, in-vitro measurements of dissociation rate show that in the absence of Dam1  
271 complex,  $k_{\text{ndc}} = 0.44 \text{ sec}^{-1}$  and in the presence of Dam1 complex it drops down to  $0.23 \text{ sec}^{-1}$   
272 (37). If the value of  $k_{\text{ndc1}}$  is also less than  $0.7 \text{ sec}^{-1}$ , biorientation cannot occur efficiently (see  
273 SI). This suggests that  $k_{\text{ndc}}$  and  $k_{\text{ndc1}}$  are smaller and greater than  $0.7 \text{ sec}^{-1}$ , respectively.

274

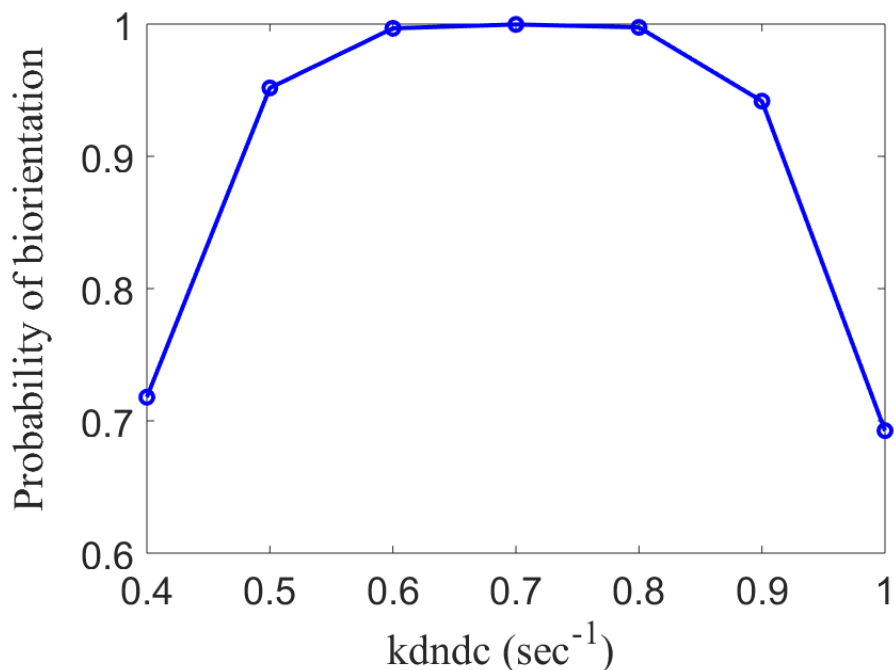

275

276

277 **Fig 5. Probability of biorientation in absence of kinase and phosphatase activities.** Probability of sister KTs  
278 reaching biorientation within 10 mins, starting from the syntelic attachment state. For this analysis we chose  $kip11 =$   
279  $0$  and  $kppx = 0$ . The probability of biorientation for  $kdnc = 0.7 \text{ sec}^{-1}$  is one. Thus, error correction and biorientation  
280 can in principle occur even in the absence of kinase and phosphatase activities.

281

282 The probability of biorientation when  $kdnc$  is smaller and  $kdnc1$  is larger than  $0.7 \text{ sec}^{-1}$  ( $kdnc =$   
283  $0.1 \text{ sec}^{-1}$  and  $kdnc1 = 1.5 \text{ sec}^{-1}$ ) is shown in Fig. 6. Different curves correspond to different  
284 values of  $kppx$ . For each curve the biorientation probability peaks over a range of  $kip11$  values.  
285 As the phosphatase activity is increased (by increasing  $kppx$ ), the peak occurs at higher values of  
286  $kip11$ , which shows that a ‘balance’ between the two activities is required. The peak value of  
287 probability in each case is one, implying that the chance of not reaching biorientation is less than  
288  $1/10000$ . Note, the range of  $kip11$  activity over which the biorientation probability is high (close to  
289 one) increases with  $kppx$ .

290

291

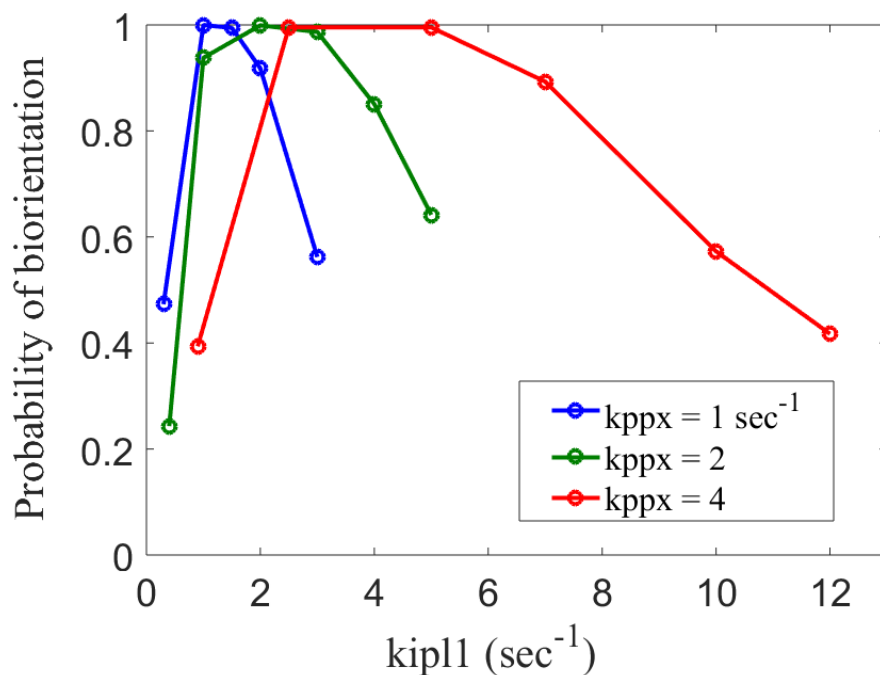

292

293

294 **Fig 6. Kinase phosphatase balance.** Probability of sister KT's reaching biorientation within 10 mins, starting from  
295 the syntelic attachment state. For this analysis we chose  $k_{dndc} = 0.1 \text{ sec}^{-1}$  and  $k_{dndc1} = 1.5 \text{ sec}^{-1}$ . Different curves  
296 correspond to different  $k_{ppx}$  (phosphatase activity) values. Peak in biorientation probability shifts to higher values  
297  $kipl1$  with increasing  $k_{ppx}$ , which suggests that a balance between the kinase and phosphatase activities is required  
298 for biorientation to occur efficiently.

299

300 To quantify the dynamics of KT-MT attachment, we calculated the fraction of time spent by  
301 sister KT's in different attachment states and the average number of transitions between different  
302 attachment states in a simulation run. The method to calculate these quantities is described in  
303 Section 5 of SI. The statistics of attachment dynamics for the case  $k_{ppx} = 4 \text{ sec}^{-1}$  (red curve in  
304 Fig. 6) is shown in Table 1. The balance point between kinase and phosphatase activities occurs  
305 at  $kipl1 = 4 \text{ sec}^{-1}$ . Below the balance point ( $kipl1 = 1 \text{ sec}^{-1}$ ), the biorientation probability drops  
306 because the KT's fail to correct the initial syntelic attachment quickly. This can be seen in the



307 large fraction of time spent by KT's in the syntelic attachment state (92%). Above the balance  
 308 point ( $k_{ip11} = 7 \text{ sec}^{-1}$ ), the biorientation probability drops because the Ndc80-microtubule  
 309 attachments, even the correct ones are disrupted too often. This can be seen in the increased  
 310 fraction of time spent in the unattached at monotelic states as well as the increased number of  
 311  $\text{amp} \rightarrow \text{mon}$  and  $\text{mon} \rightarrow \text{unattached}$  transitions (Table 2).

312

|                              |                             |       | Percent of time in each state |            |           |            |
|------------------------------|-----------------------------|-------|-------------------------------|------------|-----------|------------|
| $k_{ip11} (\text{sec}^{-1})$ | $k_{ppx} (\text{sec}^{-1})$ | Pbior | syntelic                      | unattached | monotelic | amphitelic |
| 1                            | 4                           | 0.5   | 92                            | 1          | 6         | 1          |
| 4                            | 4                           | 1     | 39                            | 5          | 34        | 22         |
| 7                            | 4                           | 0.9   | 15                            | 14         | 45        | 26         |

313

314 **Table 1.** Fraction of time spent by KT's in different KT-microtubule attachment states as a function of Ipl1 activity.

315

| $k_{ip11} (\text{sec}^{-1})$ | $k_{ppx} (\text{sec}^{-1})$ | $\text{mon} \rightarrow \text{syn}$ | $\text{amp} \rightarrow \text{mon}$ | $\text{mon} \rightarrow \text{unatt.}$ |
|------------------------------|-----------------------------|-------------------------------------|-------------------------------------|----------------------------------------|
| 1                            | 4                           | 0.03                                | 0.02                                | 0.02                                   |
| 4                            | 4                           | 0.19                                | 0.75                                | 0.54                                   |
| 7                            | 4                           | 0.63                                | 4.7                                 | 4.2                                    |

316

317 **Table 2.** Mean number of each type of transition as functions of Ipl1 activity. The states are monotelic (mon),  
 318 amphitelic (amp), syntelic (syn), unattached (unatt.).

319

320 We also determined the dependence of attachment dynamics on the absolute value of activities.

321 Table 3 shows the fraction of time in different attachment states at different kinase-phosphatase

322 values (near the optimal value of Ipl1 activity). As the values of kinase and phosphatase  
323 activities are increased, the time spent in the initial syntelic attachment drops and the time spent  
324 in unattached, monotelic and amphitelic states increases marginally. The average time for  
325 biorientation was 1.9 mins. The distribution of biorientation times is shown in Fig. S2 (see SI).  
326

|                             |                            |                                     | Percent of Time in each state |            |           |            |
|-----------------------------|----------------------------|-------------------------------------|-------------------------------|------------|-----------|------------|
| kip11 ( $\text{sec}^{-1}$ ) | kppx ( $\text{sec}^{-1}$ ) | $\langle \text{Time} \rangle$ (min) | syntelic                      | unattached | monotelic | amphitelic |
| 1                           | 1                          | 1.9                                 | 50                            | 3          | 30        | 17         |
| 2                           | 2                          | 1.9                                 | 44                            | 4          | 32        | 20         |
| 4                           | 4                          | 1.9                                 | 39                            | 5          | 34        | 22         |

327  
328 **Table 3** Statistics of the KT-MT attachment transitions as a function of Ipl1 activity. The probability of biorientation  
329 in each case is one. As the balance point of activities is increased, the time spent in syntelic attachment state drops.

330  
331 In summary, error correction and then biorientation occurs efficiently when kinase and  
332 phosphatase activities are balanced. A balance at higher absolute values of kinase and  
333 phosphatase activities has two advantages. First, it increases the range over which error  
334 correction and then biorientation can occur with high probability. Second, it increases the  
335 fraction of time spent in the monotelic and unattached states. As shown later, this marginally  
336 improves the SAC signaling strength.

337  
338 **Analytical calculation of balance point of kinase and phosphatase activities**

339 In the previous section we found that a balance between kinase and phosphatase activities is  
340 needed, but it was not clear what the balance means quantitatively. Here we determine the

341 condition that defines the balance between the two activities. To do so, the following reasoning  
342 is used: in the absence of kinase and phosphatase activities, biorientation occurs efficiently when  
343  $k_{dndc} = 0.7 \text{ sec}^{-1}$ . Then in the general, when kinase and phosphatase activities are nonzero, the  
344 activities should balance to produce an effective dissociation rate of  $0.7 \text{ sec}^{-1}$ . Thus, the balance  
345 condition can be determined by calculating the effective dissociation rate of Ndc80-MT  
346 attachment and setting it to  $0.7 \text{ sec}^{-1}$ .

347

348 To calculate the effective dissociation rate of Ndc80-MT attachment ( $k_{\text{eff}}$ ), we use the scheme  
349 shown below.

350

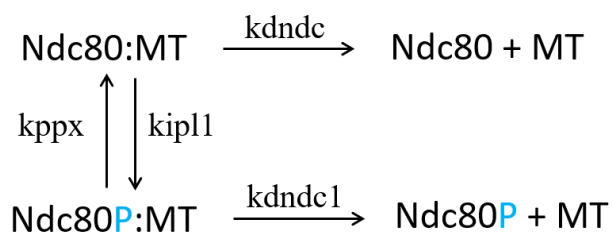

351

352

353 Dissociation of Ndc80 from MT can occur from the states Ndc80:MT or Ndc80P:MT. If we  
354 define the rate of dissociation as the inverse of mean first passage time, then the dissociation rate  
355 starting from the state Ndc80:MT is given by (see SI)

356

$$357 \quad k_1 = \frac{(\alpha \cdot \beta - \gamma)^2}{k_{dndc} \cdot (\gamma + \beta^2) + k_{dndc1} \cdot k_{ipl1} \cdot (\alpha + \beta)}, \quad (1)$$

358

359 where  $\alpha = \text{kdndc} + \text{kipl1}$ ,  $\beta = \text{kdndc1} + \text{kppx}$ , and  $\gamma = \text{kipl1} \cdot \text{kppx}$ . In the above expression  
360 we omit the number of molecules  $\text{Ipl1} = \text{PPX} = 1$ . Similarly, the rate of dissociation starting from  
361 Ndc80P:MT state is given by

362

$$363 \quad k_2 = \frac{(\alpha \cdot \beta - \gamma)^2}{\text{kdndc1} \cdot (\gamma + \alpha^2) + \text{kdndc} \cdot \text{kppx} \cdot (\alpha + \beta)}, \quad (2)$$

364

365 Assuming phosphorylated and dephosphorylated states of Ndc80 are in equilibrium, the effective  
366 dissociation rate of Ndc80-MT attachment can be written as

367

$$368 \quad k_{\text{eff}} = \frac{\text{kipl1}}{\text{kppx} + \text{kipl1}} \cdot k_1 + \frac{\text{kppx}}{\text{kppx} + \text{kipl1}} \cdot k_2, \quad (3)$$

369

370 If we assume that phosphorylation/dephosphorylation rates are much larger than the two  
371 dissociation rates, i.e.,  $\alpha \approx \text{kipl1}$  and  $\beta \approx \text{kppx}$ , then the effective dissociation rate simplifies to

372

$$373 \quad k_{\text{eff}} = \frac{\text{kipl1}}{\text{kppx} + \text{kipl1}} \cdot \text{kdndc1} + \frac{\text{kppx}}{\text{kppx} + \text{kipl1}} \cdot \text{kdndc}, \quad (4)$$

374

375 and the ratio between kinase and phosphatase activities can be written as

376

$$377 \quad x = \frac{\text{kppx}}{\text{kipl1}} = \frac{\text{kdndc1} - k_{\text{eff}}}{k_{\text{eff}} - \text{kdndc}}. \quad (5)$$

378

379 Substituting the values  $k_{dnc} = 0.1 \text{ sec}^{-1}$  and  $k_{dnc1} = 1.5 \text{ sec}^{-1}$ , and  $k_{\text{eff}} = 0.7 \text{ sec}^{-1}$  in the above  
380 equation, we find  $x = 1.33$  which is close to our observation in Fig 5, that Ipl1 and PPX activities  
381 must be approximately equal for error correction to occur efficiently. Fig 7 shows the curves at  
382 which the effective dissociation rate is equal to 0.6, 0.7, 0.8  $\text{sec}^{-1}$ . For these values the  
383 biorientation probability shown in Fig 6 is high. The dashed double arrow shows the range of  
384  $k_{\text{ipl1}}$  over which biorientation can occur efficiently. As observed earlier, this range increases  
385 with  $k_{\text{ppx}}$ .

386

387

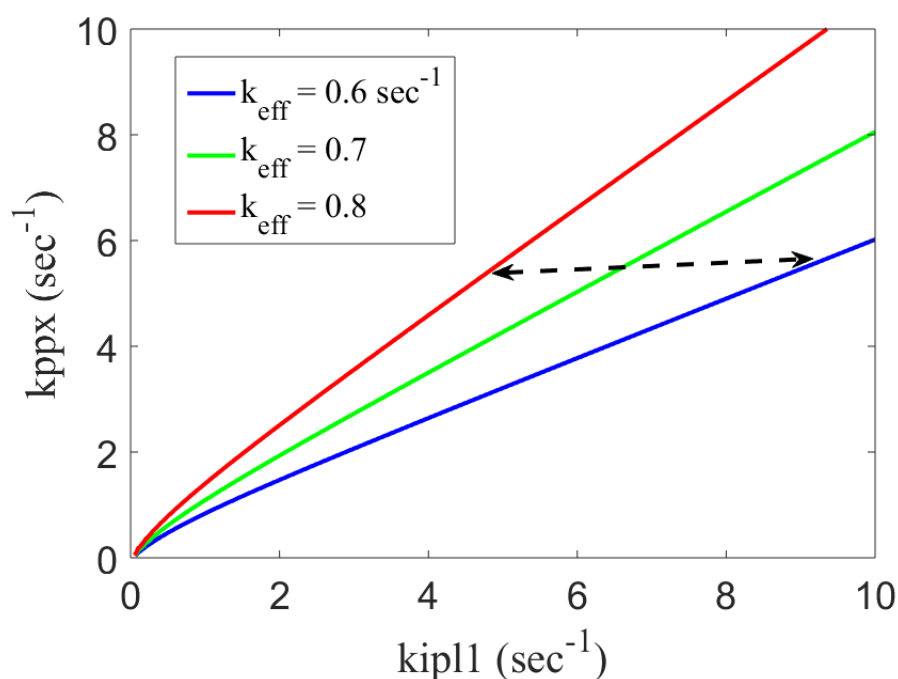

388

389

390 **Fig 7. Constant value curves for effective MT-Ndc80 dissociation rate.** Curves on which the effective  
391 dissociation constant  $k_{\text{eff}}$  is constant. The curves were calculated using Eq. 3. At a fixed value of  $k_{\text{ppx}}$  the interval  
392 between the red and the blue curve is the range of  $k_{\text{ipl1}}$  over which the biorientation probability is high (see Fig. 5).  
393 This range increases with increasing  $k_{\text{ppx}}$ .

394

### 395 **Effect of kinetochore orientation on biorientation of KTs**

396 Along with the Ipl1-dependent method of error correction, geometrical factors can also  
397 contribute towards biorientation of KTs. It has been proposed that MT attachment from one  
398 spindle pole orients the sister KT in a way that attachment from the opposite spindle pole  
399 becomes more probable (38). Such geometrical orientation of KTs can promote biorientation by  
400 reducing the chances of formation of syntelic attachments. We asked what are the relative  
401 contributions of Ipl1-dependent MT-KT detachment and KT geometrical orientation to achieving  
402 biorientation.

403

404 To study the effect of geometrical orientation we changed the parameter,  $P_{syn}$ , which was used to  
405 specify the ratio of transition between monotelic  $\rightarrow$  syntelic and monotelic  $\rightarrow$  amphitelic states.  
406 In previous analysis we chose  $P_{syn} = 0.1$ ; here we compare it with  $P_{syn} = 0.5$ , representing the  
407 case in which there is no geometrical bias preventing the formation of syntelic attachments, i.e.,  
408 the transition probabilities from monotelic to syntelic and amphitelic states are equal.

409

410 The comparison between the probability of biorientation for  $P_{syn} = 0.5$  and  $0.1$  is shown in Fig 8.  
411 For  $P_{syn} = 0.5$ , at Ipl1 activity =  $4 \text{ sec}^{-1}$ , the biorientation probability is approximately 0.9614,  
412 which shows that if the kinase and phosphatase activities are balanced, then orientation of sister  
413 KT is not critical and Ipl1-dependent error correction of syntelic attachments is good enough to  
414 reach an accuracy of 0.9614 (~ 96%).

415

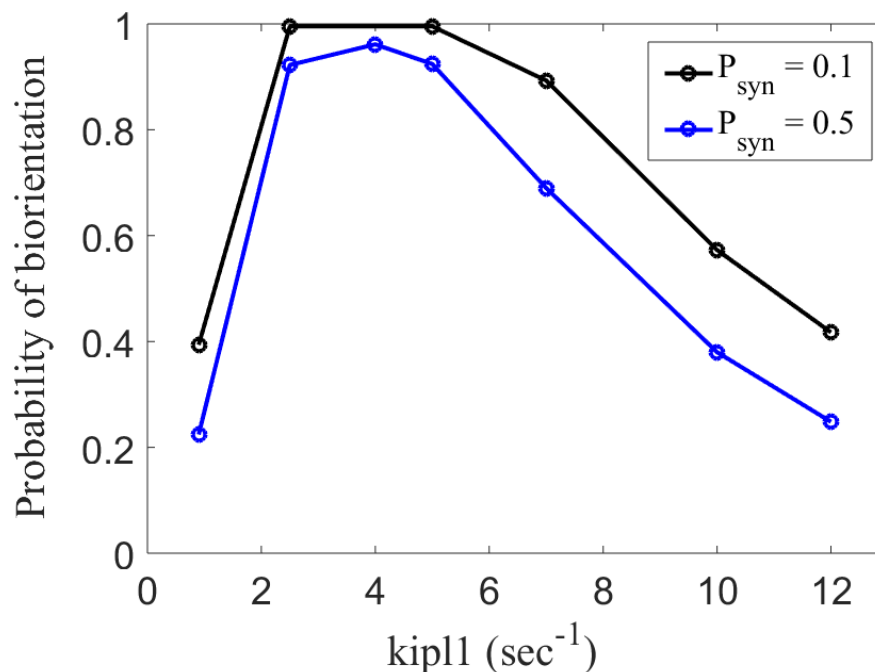

416

417

418 **Fig 8. Effect of geometrical orientation of KTs on biorientation probability.** Probability of biorientation within  
419 10 mins for different values of  $P_{\text{syn}}$ . KTs start in syntelic attachment state.  $P_{\text{syn}} = 0.5$  corresponds to the case in which  
420 KTs in monotelic state transition to syntelic and amphitelic states with equal probability.  $P_{\text{syn}} = 0.1$  corresponds to  
421 the case in which KTs in monotelic state transition to amphitelic state 10 times more often than syntelic state.

422

423 To understand why geometrical orientation of KTs is not that important we calculated the  
424 statistics of attachment dynamics for  $P_{\text{syn}} = 0.5$  case (see Table 4). As expected, the average  
425 number of monotelic to syntelic transitions increases. The average biorientation time for the  
426 realizations in which the KTs reach biorientation was approximately 3.2 mins. The average  
427 number of times the KTs were in the syntelic attachment state was 2.7. This is because the  
428 starting syntelic state and  $\text{mon} \rightarrow \text{syn}$  transitions contribute 1 and 1.7, respectively. Using these  
429 numbers and the quantities in Table 3, we find that the average of the time interval between  
430 entering and exiting syntelic attachment state is  $3.2 \text{ min} \times (46/100)/2.7 = 0.54 \text{ min}$ , which is much  
431 smaller than 10 mins. This shows that in absence of geometrical orientation of KTs the

432 probability of biorientation does not drop significantly because when the kinase-phosphatase  
 433 activities are balanced, the KTs have enough time to correct additional syntelic attachments.  
 434

|                            |                           |                     | Percent of Time in each state |                 |                   |                   |
|----------------------------|---------------------------|---------------------|-------------------------------|-----------------|-------------------|-------------------|
| kipl1 (sec <sup>-1</sup> ) | kppx (sec <sup>-1</sup> ) | Pbior               | syntelic                      | unattached      | monotelic         | amphitelic        |
| 4                          | 4                         | 0.9610 ( <b>1</b> ) | 46% ( <b>39</b> )             | 5% ( <b>5</b> ) | 34% ( <b>34</b> ) | 15% ( <b>22</b> ) |

435

| kipl1 (sec <sup>-1</sup> ) | kppx (sec <sup>-1</sup> ) | mon → syn           | amp → mon            | mon → unattached     |
|----------------------------|---------------------------|---------------------|----------------------|----------------------|
| 4                          | 4                         | 1.7 ( <b>0.19</b> ) | 0.73 ( <b>0.75</b> ) | 1.12 ( <b>0.54</b> ) |

436

437 **Table 4:** Statistics of attachment process for  $P_{\text{syn}} = 0.5$ . Top table shows the fraction of time spent in different  
 438 attachment states. The bottom table shows the average number transition between different attachment states during  
 439 single syntelic → biorientation process. The numbers in bold are the values for  $P_{\text{syn}} = 0.1$  case. The abbreviations are  
 440 monotelic (mon), amphitelic (amp), syntelic (syn).

441

#### 442 **Coupling between error correction and SAC**

443 Here we analyze the coupling between error correction and SAC. The coupling is quantified by  
 444 the strength of SAC signal, and PP1 and Mps1 binding. These quantities are defined as the  
 445 average (over time) occupancy of the corresponding states, i.e,  $\text{NSAC} = \langle \text{MELTP}:\text{BubP} \rangle$ ,  $\text{NPP1}$   
 446  $= \langle \text{RVSF}:\text{PP1} \rangle$ , and  $\text{NMps1} = \langle \text{Ndc80}:\text{Mps1} + \text{Ndc80P}:\text{Mps1} \rangle$ . The method for calculating these  
 447 quantities is described in SI. First, to quantify a strong SAC signal and to determine the value of  
 448 parameter kpp1 (the dephosphorylation rate of MELTP by PP1) we compare our simulation  
 449 results with experimental data.

450



451 Bubs bind to MELT motifs to initiate SAC signaling. The number of Bubs needed to generate a  
452 strong SAC signal is not known. In an experiment where the PP1 activity was suppressed, it was  
453 found that approximately 20 (~10 on each KT) Bubs bound to a single pair of unattached KTs  
454 (32), so we use this number as the reference point for a strong SAC signal. We calculated the  
455 strength of SAC signal in the absence of PP1 activity by setting the forward rate of PP1 binding  
456 to zero ( $k_{fpp1} = 0$ ). In this case Bub binding was  $NSAC = 18.6$ , which is close to the reference  
457 value. In our simulation this number is determined by the concentration of Bub, the  
458 association/dissociation rate of Bub to MELT, and the phosphorylation rate of MELT and Bub  
459 by Mps1 (see SI for these parameter values).

460  
461 Next, we simulated the mutant Spc105-RVAF (21), to determine the value of  $k_{pp1}$ . In this  
462 mutant Ipl1 cannot phosphorylate RVSF motif and therefore PP1 binds to the RVSF motif  
463 constitutively. Despite unhindered binding of PP1, the SAC was not turned off prematurely (21).  
464 This mutant was simulated by setting the phosphorylation rate of RVSF motif to zero ( $k_{ipl1a} =$   
465  $0$ ). Table 4 below shows  $NSAC$ ,  $NPP1$ , and  $NMps1$  for different values of  $k_{pp1}$ . For  $k_{pp1} =$   
466  $1/100 \text{ sec}^{-1}$ , the SAC signal strength is close to the reference value. Thus, we choose  $k_{pp1} =$   
467  $1/100 \text{ sec}^{-1}$ . The strength of the SAC signal is determined by the competition between Mps1 and  
468 PP1 activities. Mps1 activity ( $k_{mps1} \times NMps1$ ) is  $1.1 \text{ sec}^{-1}$  and PP1 activity is  $0.036 \text{ sec}^{-1}$ . That is,  
469 the Mps1 activity is approximately 30 times larger than PP1 activity.

470

| $k_{pp1} \text{ (sec}^{-1}\text{)}$ | NSAC | NPP1 | NMps1 |
|-------------------------------------|------|------|-------|
| 1/100                               | 18   | 3.6  | 1.1   |
| 1/50                                | 17.3 | 3.6  | 1.1   |

|      |    |     |     |
|------|----|-----|-----|
| 1/10 | 14 | 3.6 | 1.1 |
|------|----|-----|-----|

471  
472 **Table 5:** Average number of SAC signaling state, and PP1 and Mps1 bound to KT during as a function of kpp1, the  
473 PP1 dependent dephosphorylation rate of MELT motifs. The data presented in the Table was used to set the value of  
474 kpp1 to  $1/100 \text{ sec}^{-1}$ .

475  
476 Having defined the reference value for a strong SAC signal and determined the value of kpp1,  
477 next, we quantify the coupling between the SAC and error correction. Table 5 shows NSAC,  
478 NPP1 and NMps1 for different values of kipl1 (corresponding to the red curve in Fig. 6). NPP1  
479 is constant because it does not depend on kipl1 and kppx; its value is set by kipl1a and kpp2, the  
480 phosphorylation/dephosphorylation rates of RVSF motif by Ipl1 and PP2A, respectively. At  
481  $kipl1 = 1 \text{ sec}^{-1}$ , NSAC is considerably smaller than the reference value (of 20) because the KTs  
482 get stuck in the syntelic attachment state with most of the Ndc80s bound to MT. This precludes  
483 the binding of Mps1 and activation of SAC. As kipl1 is increased to  $4 \text{ sec}^{-1}$ , the fraction of time  
484 spent by the sister KTs in the unattached and monotelic states increases (see Table 1). This leads  
485 to higher binding of Mps1 (NMps1) and a significantly stronger SAC signal. At  $kipl1 = 7 \text{ sec}^{-1}$ ,  
486 NMps1 and NSAC increase further but, as shown earlier, the probability of biorientation of KTs  
487 drops.

488

| kipl1 ( $\text{sec}^{-1}$ ) | kppx ( $\text{sec}^{-1}$ ) | NSAC | NPP1 | NMps1 |
|-----------------------------|----------------------------|------|------|-------|
| 1                           | 4                          | 8.4  | 3.7  | 0.1   |
| 4                           | 4                          | 18.5 | 3.6  | 1.2   |
| 7                           | 4                          | 23.1 | 3.6  | 1.8   |

489

490 **Table 6:** Average number of SAC signaling state, PP1 molecules bound to KT, and Mps1 molecules bound to  
491 Ndc80 as function of Ipl1 dependent phosphorylation rate of Ndc80 (kip11).

492  
493 We also determined how the strength of SAC signal depends on the absolute values of kinase-  
494 phosphatase activities. The values of NSAC, NPP1 and NMps1 at different value of activities  
495 (while maintaining the balance) are given Table 6. Earlier, we found that a balance point at  
496 higher activity leads to KTs spending a higher fraction of time in the unattached and monotelic  
497 states. Here we see that it leads to a small increase in NMps1 and NSAC.

498

| kip11 (sec <sup>-1</sup> ) | kppx (sec <sup>-1</sup> ) | NSAC | NPP1 | NMps1 |
|----------------------------|---------------------------|------|------|-------|
| 1                          | 1                         | 16.3 | 3.6  | 0.9   |
| 2                          | 2                         | 16.8 | 3.6  | 1     |
| 4                          | 4                         | 18.5 | 3.6  | 1.2   |

499

500 **Table 7:** Average number of SAC signaling state, PP1 molecules bound to KT, and Mps1 molecules bound to  
501 Ndc80 at different values of kinase and phosphatase activities.

502

## 503 **Discussion**

504 Fidelity of chromosome segregation process is guarded by two coupled mechanisms: error  
505 correction in KT-MT attachments and the SAC. The error correction mechanism removes  
506 erroneous attachments between KT and MT, and the SAC ensures that cells do not proceed to  
507 anaphase until all chromosomes are correctly attached. In this paper we present a stochastic  
508 model to study how the opposing activities of these kinases and phosphatases affect these two  
509 mechanisms in budding yeast. Our model includes the dynamics of MT attachment to KT

510 through Ndc80, binding of key kinases PP1 and Mps1 to the KT and the activities of Ipl1 and  
511 PP2A and PPX (an unknown phosphatase that opposes Ipl1). We used this setup to calculate the  
512 probability that a pair of KTs reach biorientation within 10 mins, starting from the syntelic  
513 attachment state, and also the statistical details of the attachment process, like the time spent by  
514 KTs in different attachment states and the number of transitions between different attachment  
515 states.

516

517 We find that a balance between the kinase (Ipl1) and phosphatase (PPX) activities is required for  
518 KTs to reach biorientation efficiently. The balance point is defined by the ratio between the  
519 kinase and phosphatase activities. If the Ipl1 activity is below the balance point, biorientation  
520 probability drops because MT-Ndc80 attachments are stabilized excessively and correcting  
521 initial syntelic attachments takes longer time. On the other hand, if Ipl1 activity is above the  
522 balance point, the correct MT-Ndc80 attachments are destabilized too often for the KTs to reach  
523 biorientation efficiently. We derive an approximate analytical formula that defines the balance  
524 point and show that at higher absolute value of kinase and phosphatase activities (while  
525 maintaining the balance) the range of over which balance can be achieved is larger. This can  
526 make the error correction process more robust to fluctuations in absolute value of kinase and  
527 phosphatase activities.

528

529 The error correction process generates unattached kinetochores which then can initiate SAC  
530 signaling. This is one way the error correction mechanism is coupled to the SAC. Our analysis of  
531 this coupling shows that to maintain a strong SAC signal, first, the Ipl1 activity must be equal to  
532 (or larger than) the value defined by the balance point. Otherwise the SAC strength drops

533 because the KTs get stuck in the syntelic attachment state. And second, the activity of Mps1  
534 must be significantly larger than PP1 activity (our estimate is 30 time larger). Otherwise, the  
535 dephosphorylation of MELT motifs by PP1 starts reducing the signal strength. The strength of  
536 SAC signal crucially depends on the Mps1 activity. When the KTs get stuck in the syntelic  
537 attachment state, the SAC signal drops because KTs cannot recruit enough Mps1. Interestingly,  
538 experiments show that even after biorientation some residual Mps1 remains on the KTs (25). If  
539 this residual Mps1 is present on KTs in the syntelic attachment state, it can probably initiate SAC  
540 signaling. This pathway of initiating SAC would not depend on the creation of unattached  
541 kinetochores.

542

543 When one KT attaches to one spindle pole, the sister KT is constrained to face the opposite  
544 spindle pole. We calculated how the probability of biorientation is affected when that constraint  
545 is relaxed and found that if the Ipl1 activity is near its optimal value (as determined by our  
546 analysis) then the Ipl1-dependent error correction mechanism is sufficient for achieving timely  
547 biorientation with 96% accuracy, regardless of geometric constraints. However, such constraints  
548 can modestly improve the efficiency of reaching biorientation.

549

550 Several questions still remain unanswered. First, what is the role of PP2, if at all there is one?  
551 The phosphatase PP2A dephosphorylates RVSF motif to facilitate PP1 binding. However,  
552 experiments show that dynamic regulation of PP1 binding to Spc105 is not essential for mitosis  
553 (21). Therefore, the role of PP2A in budding yeast also seems unimportant. Second, how PP1  
554 turns off the SAC signal? PP1 can actively promote dissociation of Bubs, i.e., the dissociation  
555 rate is proportional to PP1; or PP1 can oppose the binding of Bubs by dephosphorylating the

556 MELT repeats (as in our model). In the latter case PP1 does not actively turn off the SAC, but  
557 only prevents its activation. Another interesting possibility is that PP1 dephosphorylates the Bub  
558 in MELTP:BubP to turn off the SAC. We think our model will provide a suitable starting point  
559 for analyzing these different possibilities when more experimental data becomes available. We  
560 also think our model can be adapted to study the same questions in fission yeast and mammals.  
561 In these organisms the number of binding sites for kinases and phosphatases at KT, and MT  
562 attachments per KT is much larger. Furthermore, in these organisms merotelic attachment states  
563 are observed. Including these details in the model will significantly increase the number of  
564 species and hence the computational cost, but nevertheless will provide a method to study error  
565 correction and its coupling to SAC in these organisms.

566

## 567 **Acknowledgements**

568 “Research reported in this publication was supported by the National Institute of General  
569 Medical Sciences of the National Institutes of Health under Award Number R01GM078989. The  
570 content is solely the responsibility of the authors and does not necessarily represent the official  
571 views of the National Institutes of Health.

572

## 573 **References**

- 574 1. Tanaka TU. Chromosome bi-orientation on the mitotic spindle. *Philos Trans R Soc Lond B Biol*  
575 *Sci.* 2005;360(1455):581-9.
- 576 2. Tanaka TU. Kinetochore–microtubule interactions: steps towards bi-orientation. *The EMBO*  
577 *Journal.* 2010;29(24):4070-82.

- 578 3. Tanaka TU, Rachidi N, Janke C, Pereira G, Galova M, Schiebel E, et al. Evidence that the Ipl1-  
579 Sli15 (Aurora kinase-INCENP) complex promotes chromosome bi-orientation by altering kinetochore-  
580 spindle pole connections. *Cell*. 2002;108(3):317-29.
- 581 4. Biggins S, Murray AW. The budding yeast protein kinase Ipl1/Aurora allows the absence of  
582 tension to activate the spindle checkpoint. *Genes Dev*. 2001;15(23):3118-29.
- 583 5. Cheeseman IM, Anderson S, Jwa M, Green EM, Kang J, Yates JR, 3rd, et al. Phospho-regulation  
584 of kinetochore-microtubule attachments by the Aurora kinase Ipl1p. *Cell*. 2002;111(2):163-72.
- 585 6. Wigge PA, Kilmartin JV. The Ndc80p complex from *Saccharomyces cerevisiae* contains  
586 conserved centromere components and has a function in chromosome segregation. *J Cell Biol*.  
587 2001;152(2):349-60.
- 588 7. DeLuca JG, Gall WE, Ciferri C, Cimini D, Musacchio A, Salmon ED. Kinetochore microtubule  
589 dynamics and attachment stability are regulated by Hec1. *Cell*. 2006;127(5):969-82.
- 590 8. Akiyoshi B, Nelson CR, Ranish JA, Biggins S. Analysis of Ipl1-mediated phosphorylation of the  
591 Ndc80 kinetochore protein in *Saccharomyces cerevisiae*. *Genetics*. 2009;183(4):1591-5.
- 592 9. Zaytsev AV, Mick JE, Maslennikov E, Nikashin B, DeLuca JG, Grishchuk EL. Multisite  
593 phosphorylation of the NDC80 complex gradually tunes its microtubule-binding affinity. *Mol Biol Cell*.  
594 2015;26(10):1829-44.
- 595 10. Cheerambathur DK, Prevo B, Hattersley N, Lewellyn L, Corbett KD, Oegema K, et al.  
596 Dephosphorylation of the Ndc80 Tail Stabilizes Kinetochore-Microtubule Attachments via the Ska  
597 Complex. *Dev Cell*. 2017;41(4):424-37 e4.
- 598 11. Cordeiro MH, Smith RJ, Saurin AT. A fine balancing act: A delicate kinase-phosphatase  
599 equilibrium that protects against chromosomal instability and cancer. *Int J Biochem Cell Biol*.  
600 2018;96:148-56.
- 601 12. Vallardi G, Cordeiro MH, Saurin AT. A Kinase-Phosphatase Network that Regulates  
602 Kinetochore-Microtubule Attachments and the SAC. *Prog Mol Subcell Biol*. 2017;56:457-84.

- 603 13. Gelens L, Qian J, Bollen M, Saurin AT. The Importance of Kinase-Phosphatase Integration:  
604 Lessons from Mitosis. *Trends Cell Biol.* 2018;28(1):6-21.
- 605 14. Biggins S, Severin FF, Bhalla N, Sassoon I, Hyman AA, Murray AW. The conserved protein  
606 kinase Ipl1 regulates microtubule binding to kinetochores in budding yeast. *Genes Dev.* 1999;13(5):532-  
607 44.
- 608 15. Pinsky BA, Kotwaliwale CV, Tatsutani SY, Breed CA, Biggins S. Glc7/protein phosphatase 1  
609 regulatory subunits can oppose the Ipl1/aurora protein kinase by redistributing Glc7. *Mol Cell Biol.*  
610 2006;26(7):2648-60.
- 611 16. Liu D, Vleugel M, Backer CB, Hori T, Fukagawa T, Cheeseman IM, et al. Regulated targeting of  
612 protein phosphatase 1 to the outer kinetochore by KNL1 opposes Aurora B kinase. *J Cell Biol.*  
613 2010;188(6):809-20.
- 614 17. Lara-Gonzalez P, Westhorpe FG, Taylor SS. The spindle assembly checkpoint. *Curr Biol.*  
615 2012;22(22):R966-80.
- 616 18. Foley EA, Kapoor TM. Microtubule attachment and spindle assembly checkpoint signalling at the  
617 kinetochore. *Nat Rev Mol Cell Biol.* 2013;14(1):25-37.
- 618 19. Pinsky BA, Kung C, Shokat KM, Biggins S. The Ipl1-Aurora protein kinase activates the spindle  
619 checkpoint by creating unattached kinetochores. *Nat Cell Biol.* 2006;8(1):78-83.
- 620 20. Musacchio A, Salmon ED. The spindle-assembly checkpoint in space and time. *Nat Rev Mol Cell*  
621 *Biol.* 2007;8(5):379-93.
- 622 21. Rosenberg JS, Cross FR, Funabiki H. KNL1/Spc105 recruits PP1 to silence the spindle assembly  
623 checkpoint. *Curr Biol.* 2011;21(11):942-7.
- 624 22. London N, Ceto S, Ranish JA, Biggins S. Phosphoregulation of Spc105 by Mps1 and PP1  
625 regulates Bub1 localization to kinetochores. *Curr Biol.* 2012;22(10):900-6.
- 626 23. Pinsky BA, Nelson CR, Biggins S. Protein phosphatase 1 regulates exit from the spindle  
627 checkpoint in budding yeast. *Curr Biol.* 2009;19(14):1182-7.



- 628 24. Winey M, Mamay CL, O'Toole ET, Mastronarde DN, Giddings TH, Jr., McDonald KL, et al.  
629 Three-dimensional ultrastructural analysis of the *Saccharomyces cerevisiae* mitotic spindle. *J Cell Biol.*  
630 1995;129(6):1601-15.
- 631 25. Hiruma Y, Sacristan C, Pachis ST, Adamopoulos A, Kuijt T, Ubbink M, et al. CELL DIVISION  
632 CYCLE. Competition between MPS1 and microtubules at kinetochores regulates spindle checkpoint  
633 signaling. *Science.* 2015;348(6240):1264-7.
- 634 26. Ji Z, Gao H, Yu H. CELL DIVISION CYCLE. Kinetochores attachment sensed by competitive  
635 Mps1 and microtubule binding to Ndc80C. *Science.* 2015;348(6240):1260-4.
- 636 27. Tubman ES, Biggins S, Odde DJ. Stochastic Modeling Yields a Mechanistic Framework for  
637 Spindle Attachment Error Correction in Budding Yeast Mitosis. *Cell Syst.* 2017;4(6):645-50 e5.
- 638 28. Gay G, Courtheoux T, Reyes C, Tournier S, Gachet Y. A stochastic model of kinetochore-  
639 microtubule attachment accurately describes fission yeast chromosome segregation. *J Cell Biol.*  
640 2012;196(6):757-74.
- 641 29. Welburn JP, Vleugel M, Liu D, Yates JR, 3rd, Lampson MA, Fukagawa T, et al. Aurora B  
642 phosphorylates spatially distinct targets to differentially regulate the kinetochore-microtubule interface.  
643 *Mol Cell.* 2010;38(3):383-92.
- 644 30. Liu D, Vader G, Vromans MJ, Lampson MA, Lens SM. Sensing chromosome bi-orientation by  
645 spatial separation of aurora B kinase from kinetochore substrates. *Science.* 2009;323(5919):1350-3.
- 646 31. Joglekar AP, Bouck DC, Molk JN, Bloom KS, Salmon ED. Molecular architecture of a  
647 kinetochore-microtubule attachment site. *Nat Cell Biol.* 2006;8(6):581-5.
- 648 32. Aravamudhan P, Chen R, Roy B, Sim J, Joglekar AP. Dual mechanisms regulate the recruitment  
649 of spindle assembly checkpoint proteins to the budding yeast kinetochore. *Mol Biol Cell.*  
650 2016;27(22):3405-17.
- 651 33. London N, Biggins S. Mad1 kinetochore recruitment by Mps1-mediated phosphorylation of Bub1  
652 signals the spindle checkpoint. *Genes Dev.* 2014;28(2):140-52.

- 653 34. De Antoni A, Pearson CG, Cimini D, Canman JC, Sala V, Nezi L, et al. The Mad1/Mad2  
654 complex as a template for Mad2 activation in the spindle assembly checkpoint. *Curr Biol.*  
655 2005;15(3):214-25.
- 656 35. Tanaka TU, Desai A. Kinetochore-microtubule interactions: the means to the end. *Curr Opin Cell*  
657 *Biol.* 2008;20(1):53-63.
- 658 36. Shaw SL, Maddox P, Skibbens RV, Yeh E, Salmon ED, Bloom K. Nuclear and spindle dynamics  
659 in budding yeast. *Mol Biol Cell.* 1998;9(7):1627-31.
- 660 37. Tien JF, Umbreit NT, Gestaut DR, Franck AD, Cooper J, Wordeman L, et al. Cooperation of the  
661 Dam1 and Ndc80 kinetochore complexes enhances microtubule coupling and is regulated by aurora B. *J*  
662 *Cell Biol.* 2010;189(4):713-23.
- 663 38. Indjeian VB, Murray AW. Budding yeast mitotic chromosomes have an intrinsic bias to biorient  
664 on the spindle. *Curr Biol.* 2007;17(21):1837-46.
- 665

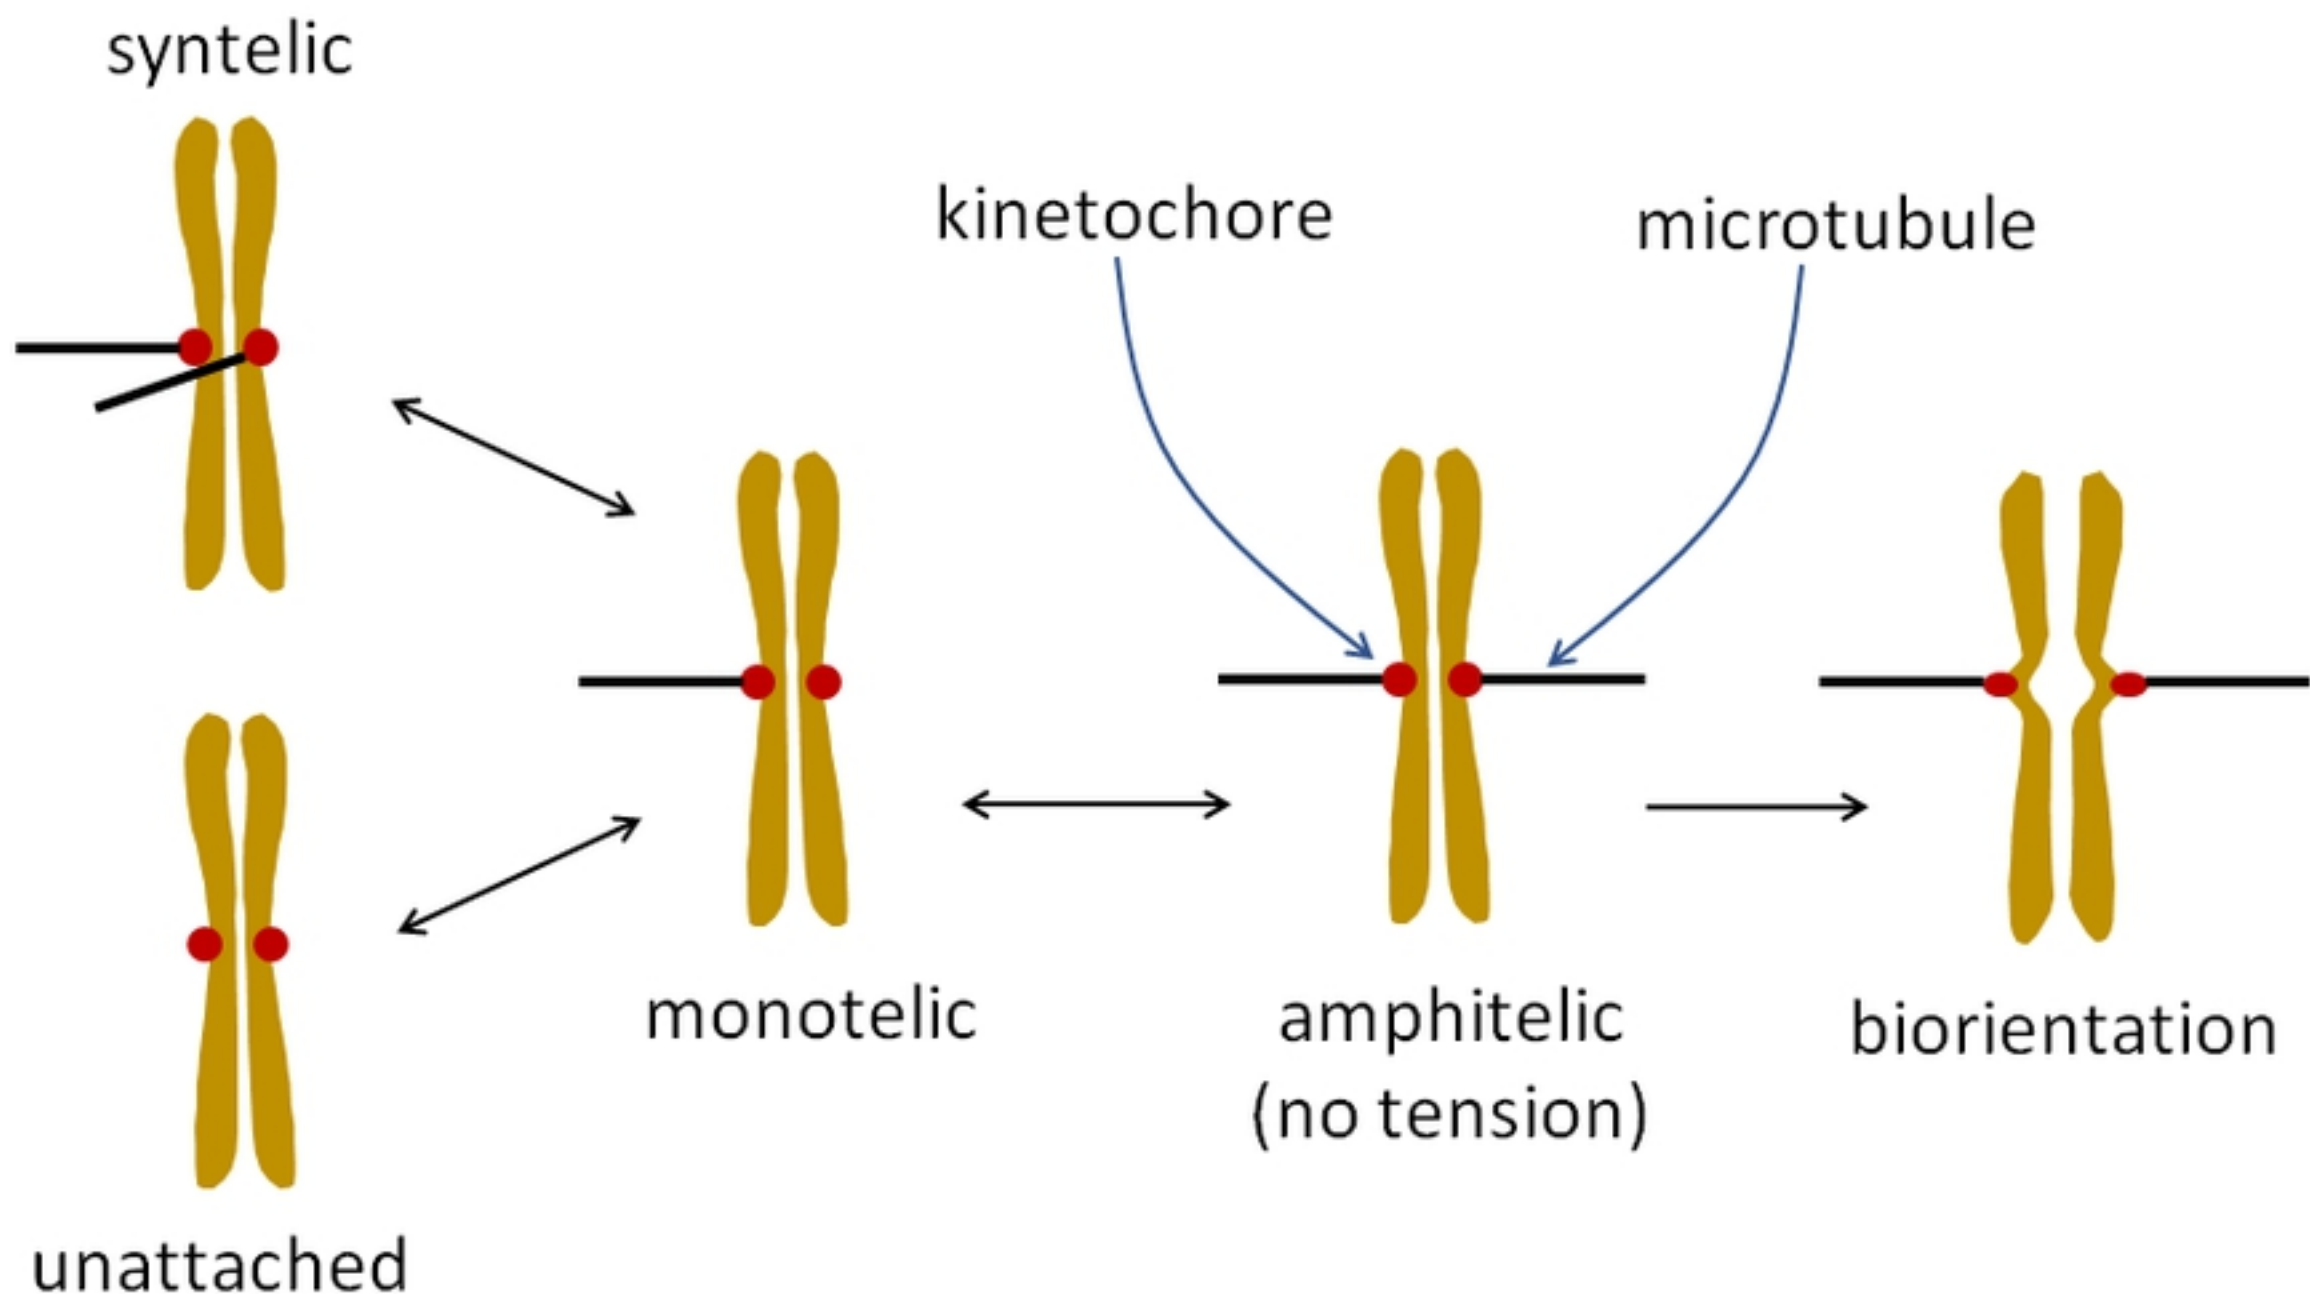

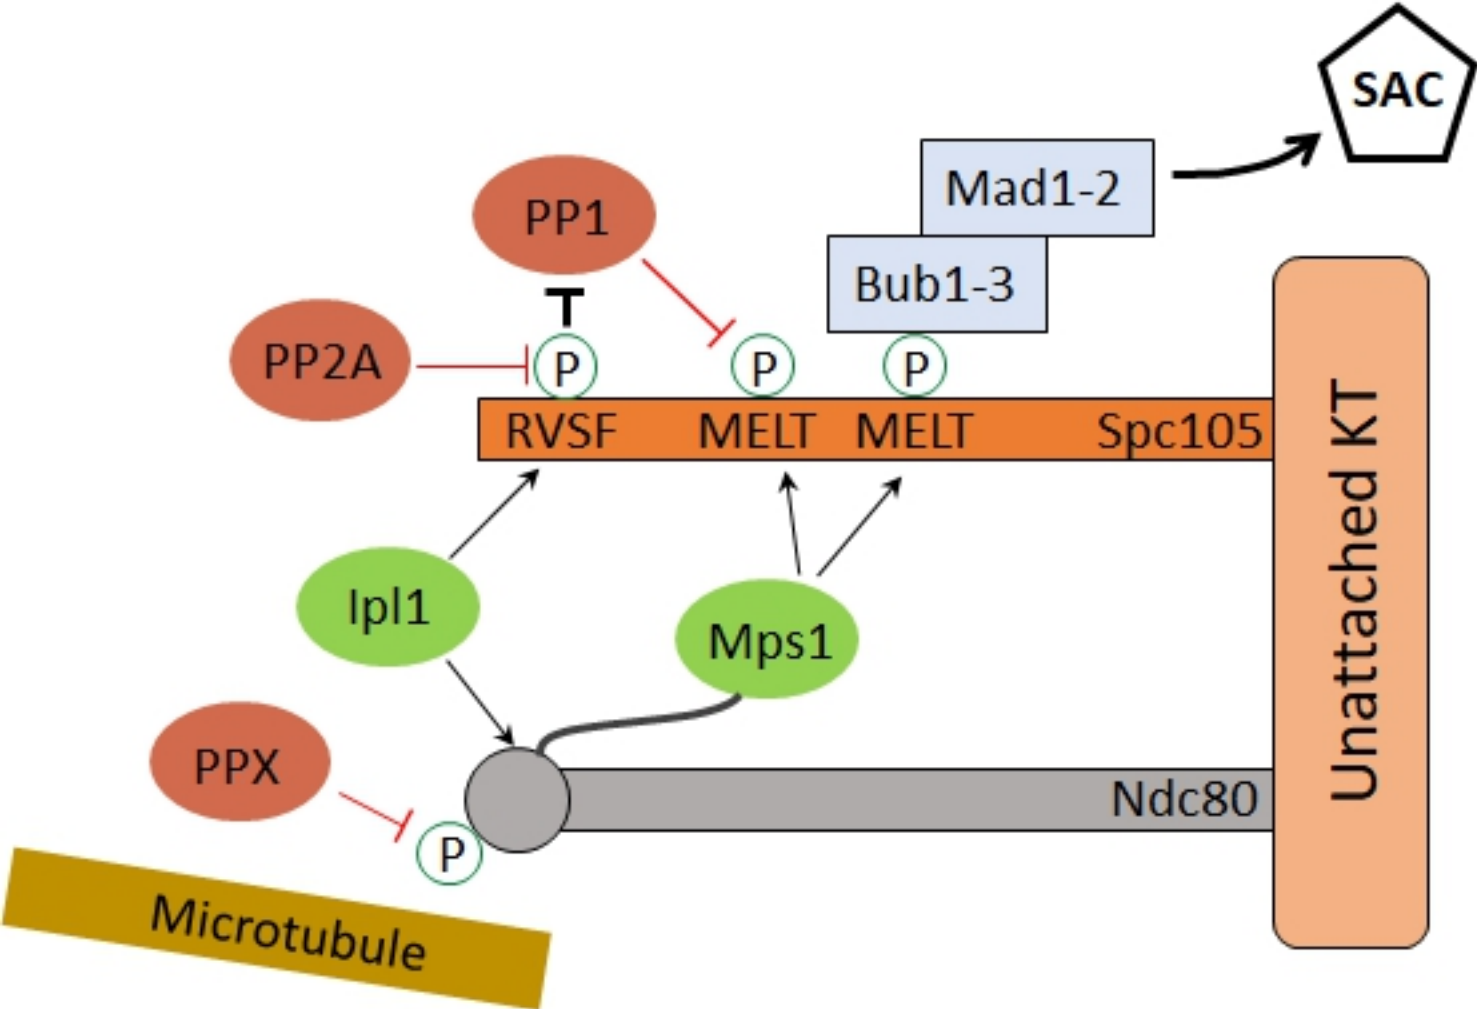

A

bioRxiv preprint doi: <https://doi.org/10.1101/541573>; this version posted February 7, 2019. The copyright holder for this preprint (which was not certified by peer review) is the author/funder, who has granted bioRxiv a license to display the preprint in perpetuity. It is made available under aCC-BY 4.0 International license.

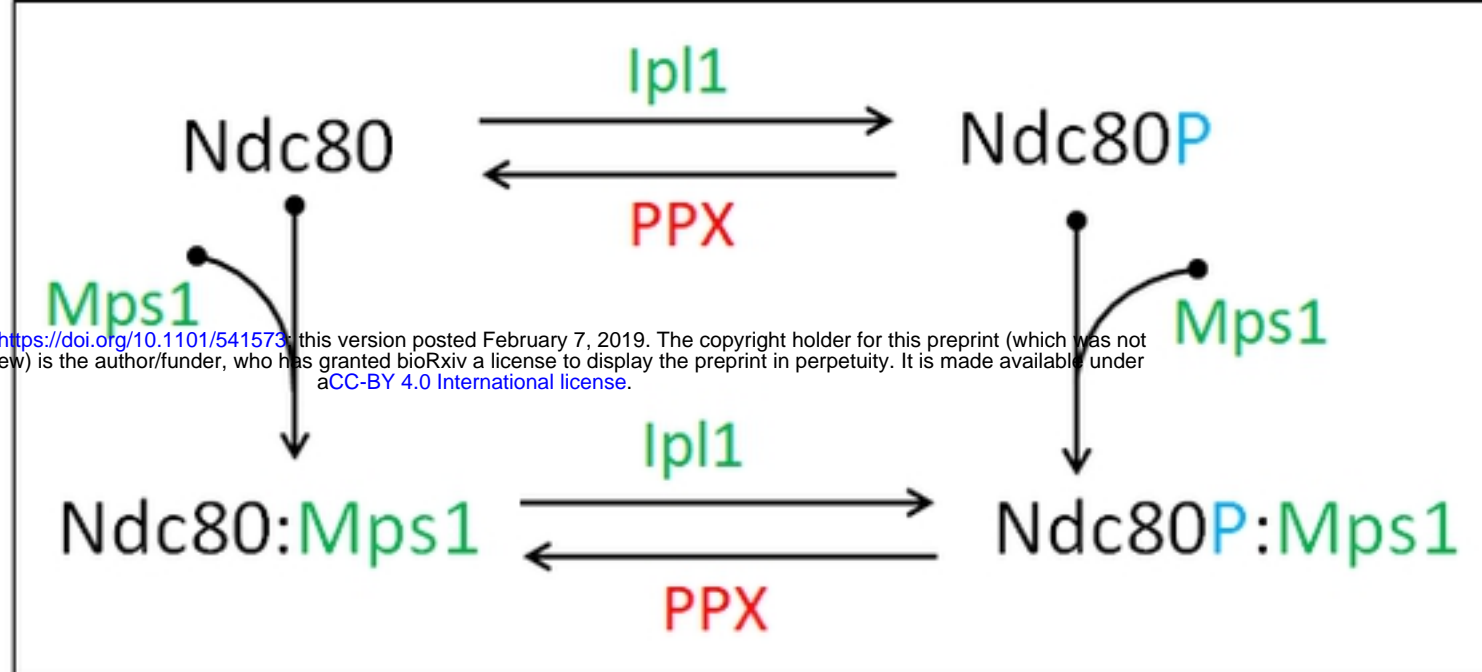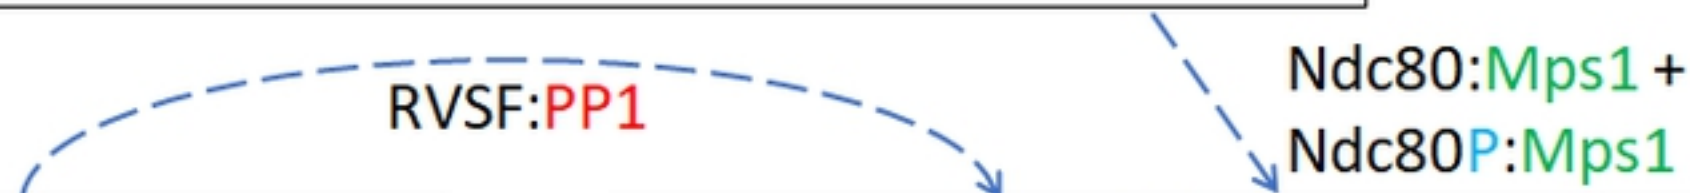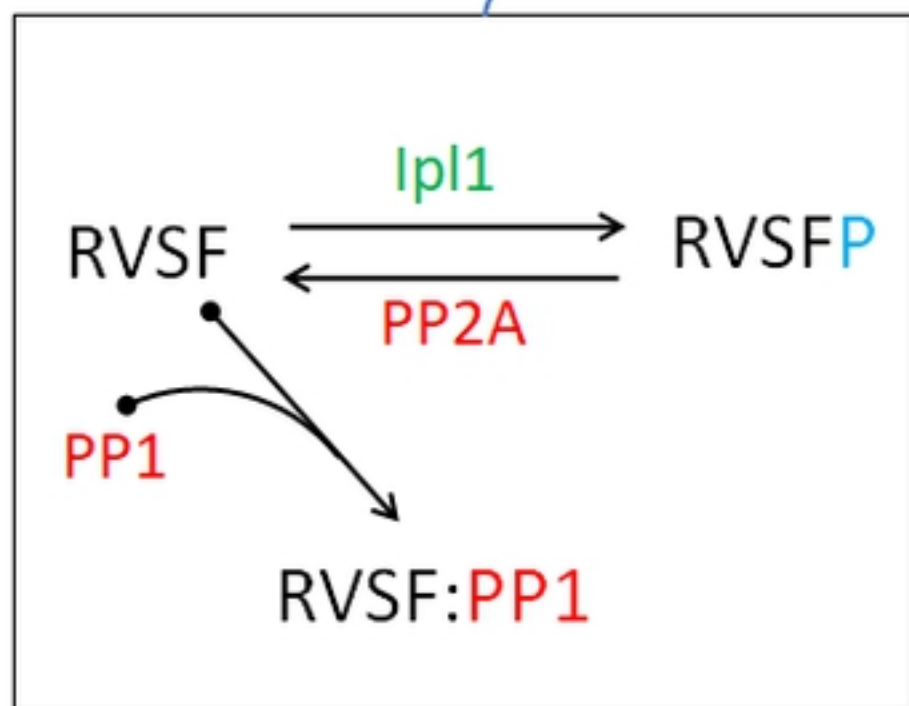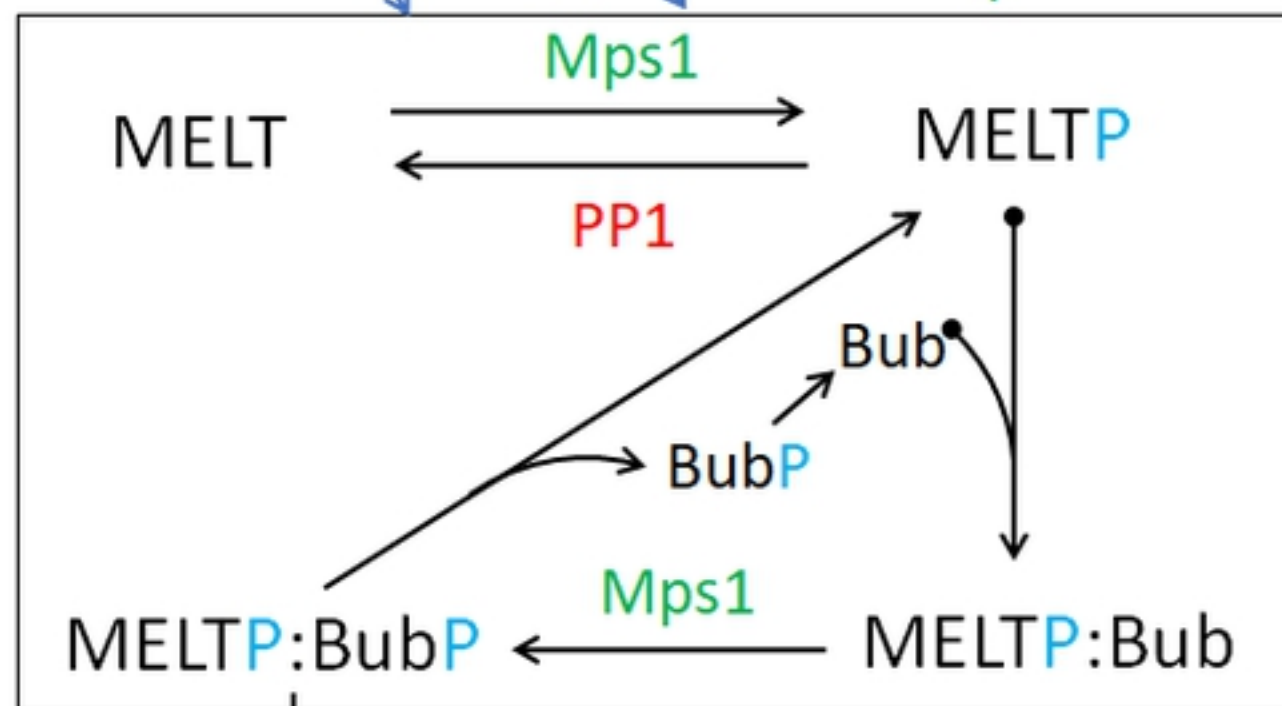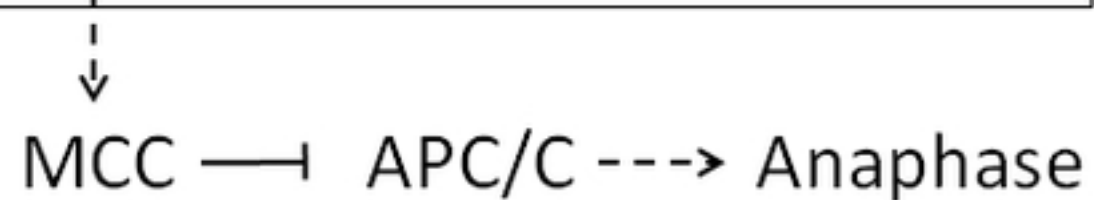

B

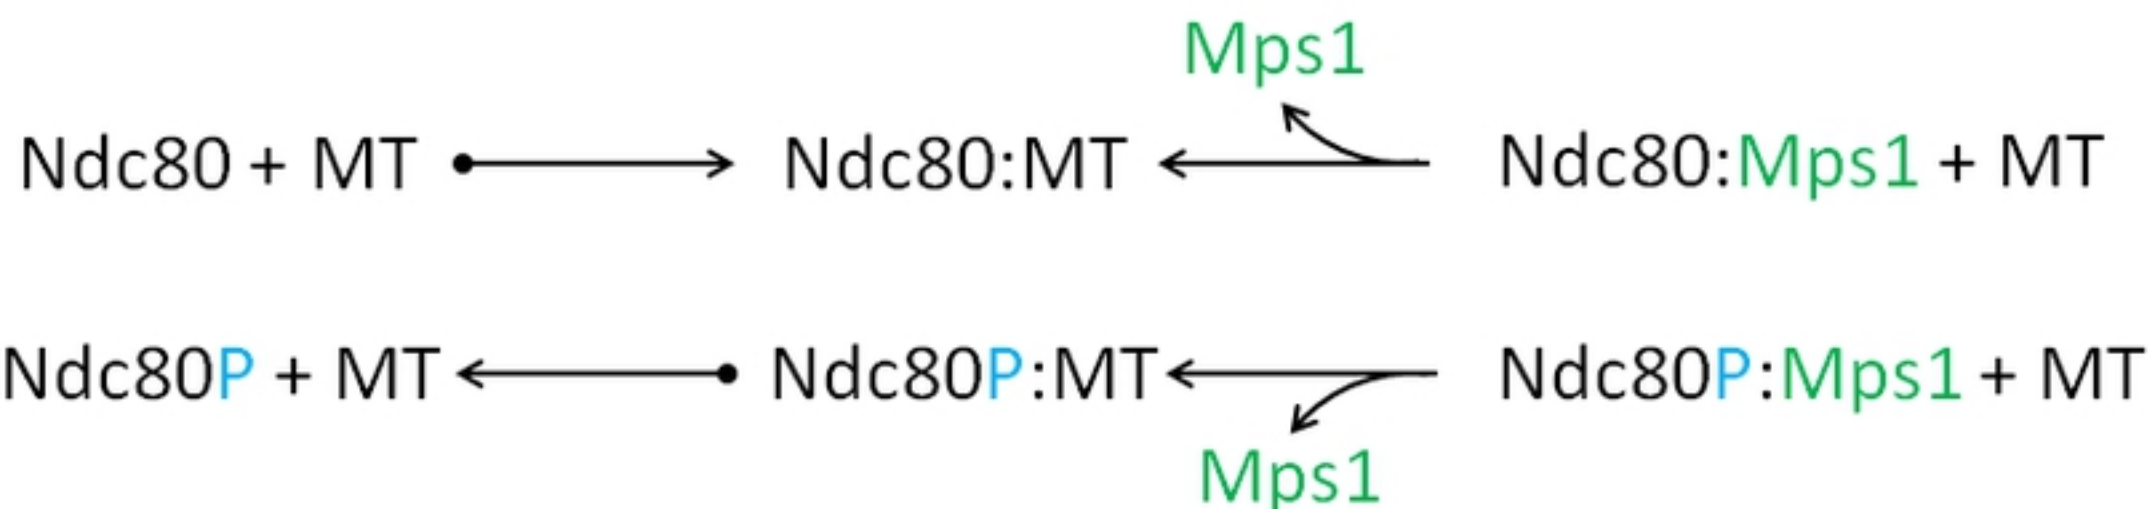

<https://doi.org/10.1101/541573>

CC-BY 4.0 International license

$(0,0)$

|           |           |           |           |           |
|-----------|-----------|-----------|-----------|-----------|
| $(1,5)_s$ | $(2,5)_s$ | $(3,5)_s$ | $(4,5)_s$ | $(5,5)_s$ |
| $(1,4)_s$ | $(2,4)_s$ | $(3,4)_s$ | $(4,4)_s$ | $(5,4)_s$ |
| $(1,3)_s$ | $(2,3)_s$ | $(3,3)_s$ | $(4,3)_s$ | $(5,3)_s$ |
| $(1,2)_s$ | $(2,2)_s$ | $(3,2)_s$ | $(4,2)_s$ | $(5,2)_s$ |
| $(1,1)_s$ | $(2,1)_s$ | $(3,1)_s$ | $(4,1)_s$ | $(5,1)_s$ |
| $(1,1)_a$ | $(2,1)_a$ | $(3,1)_a$ | $(4,1)_a$ | $(5,1)_a$ |
| $(1,2)_a$ | $(2,2)_a$ | $(3,2)_a$ | $(4,2)_a$ | $(5,2)_a$ |
| $(1,3)_a$ | $(2,3)_a$ | $(3,3)_a$ | $(4,3)_a$ | $(5,3)_a$ |
| $(1,4)_a$ | $(2,4)_a$ | $(3,4)_a$ | $(4,4)_a$ | $(5,4)_a$ |
| $(1,5)_a$ | $(2,5)_a$ | $(3,5)_a$ | $(4,5)_a$ | $(5,5)_a$ |

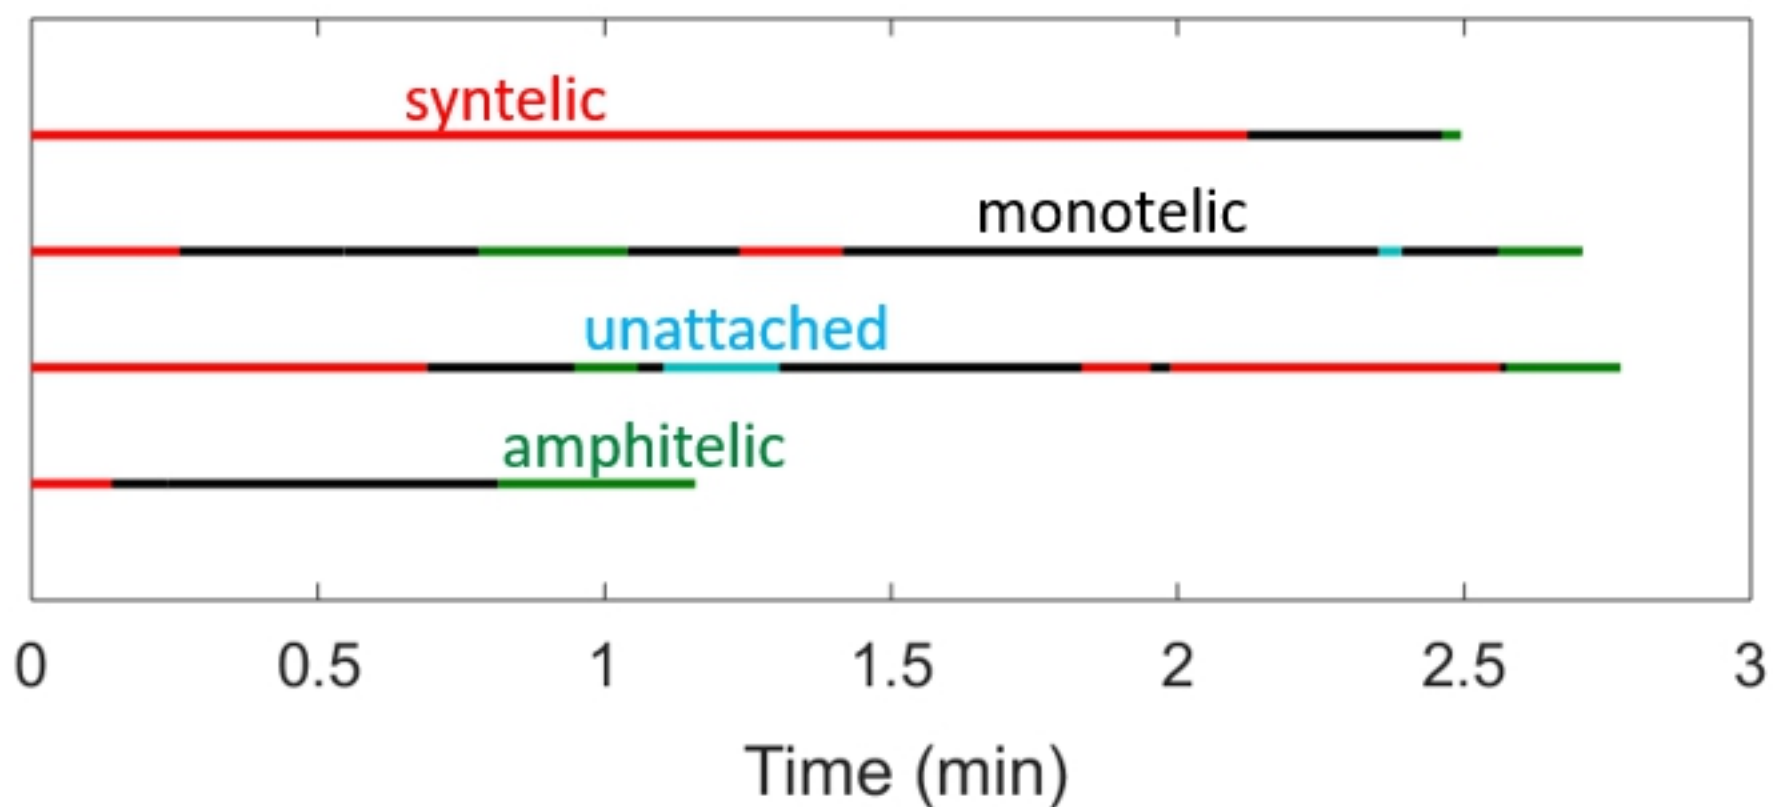

Probability of biorientation

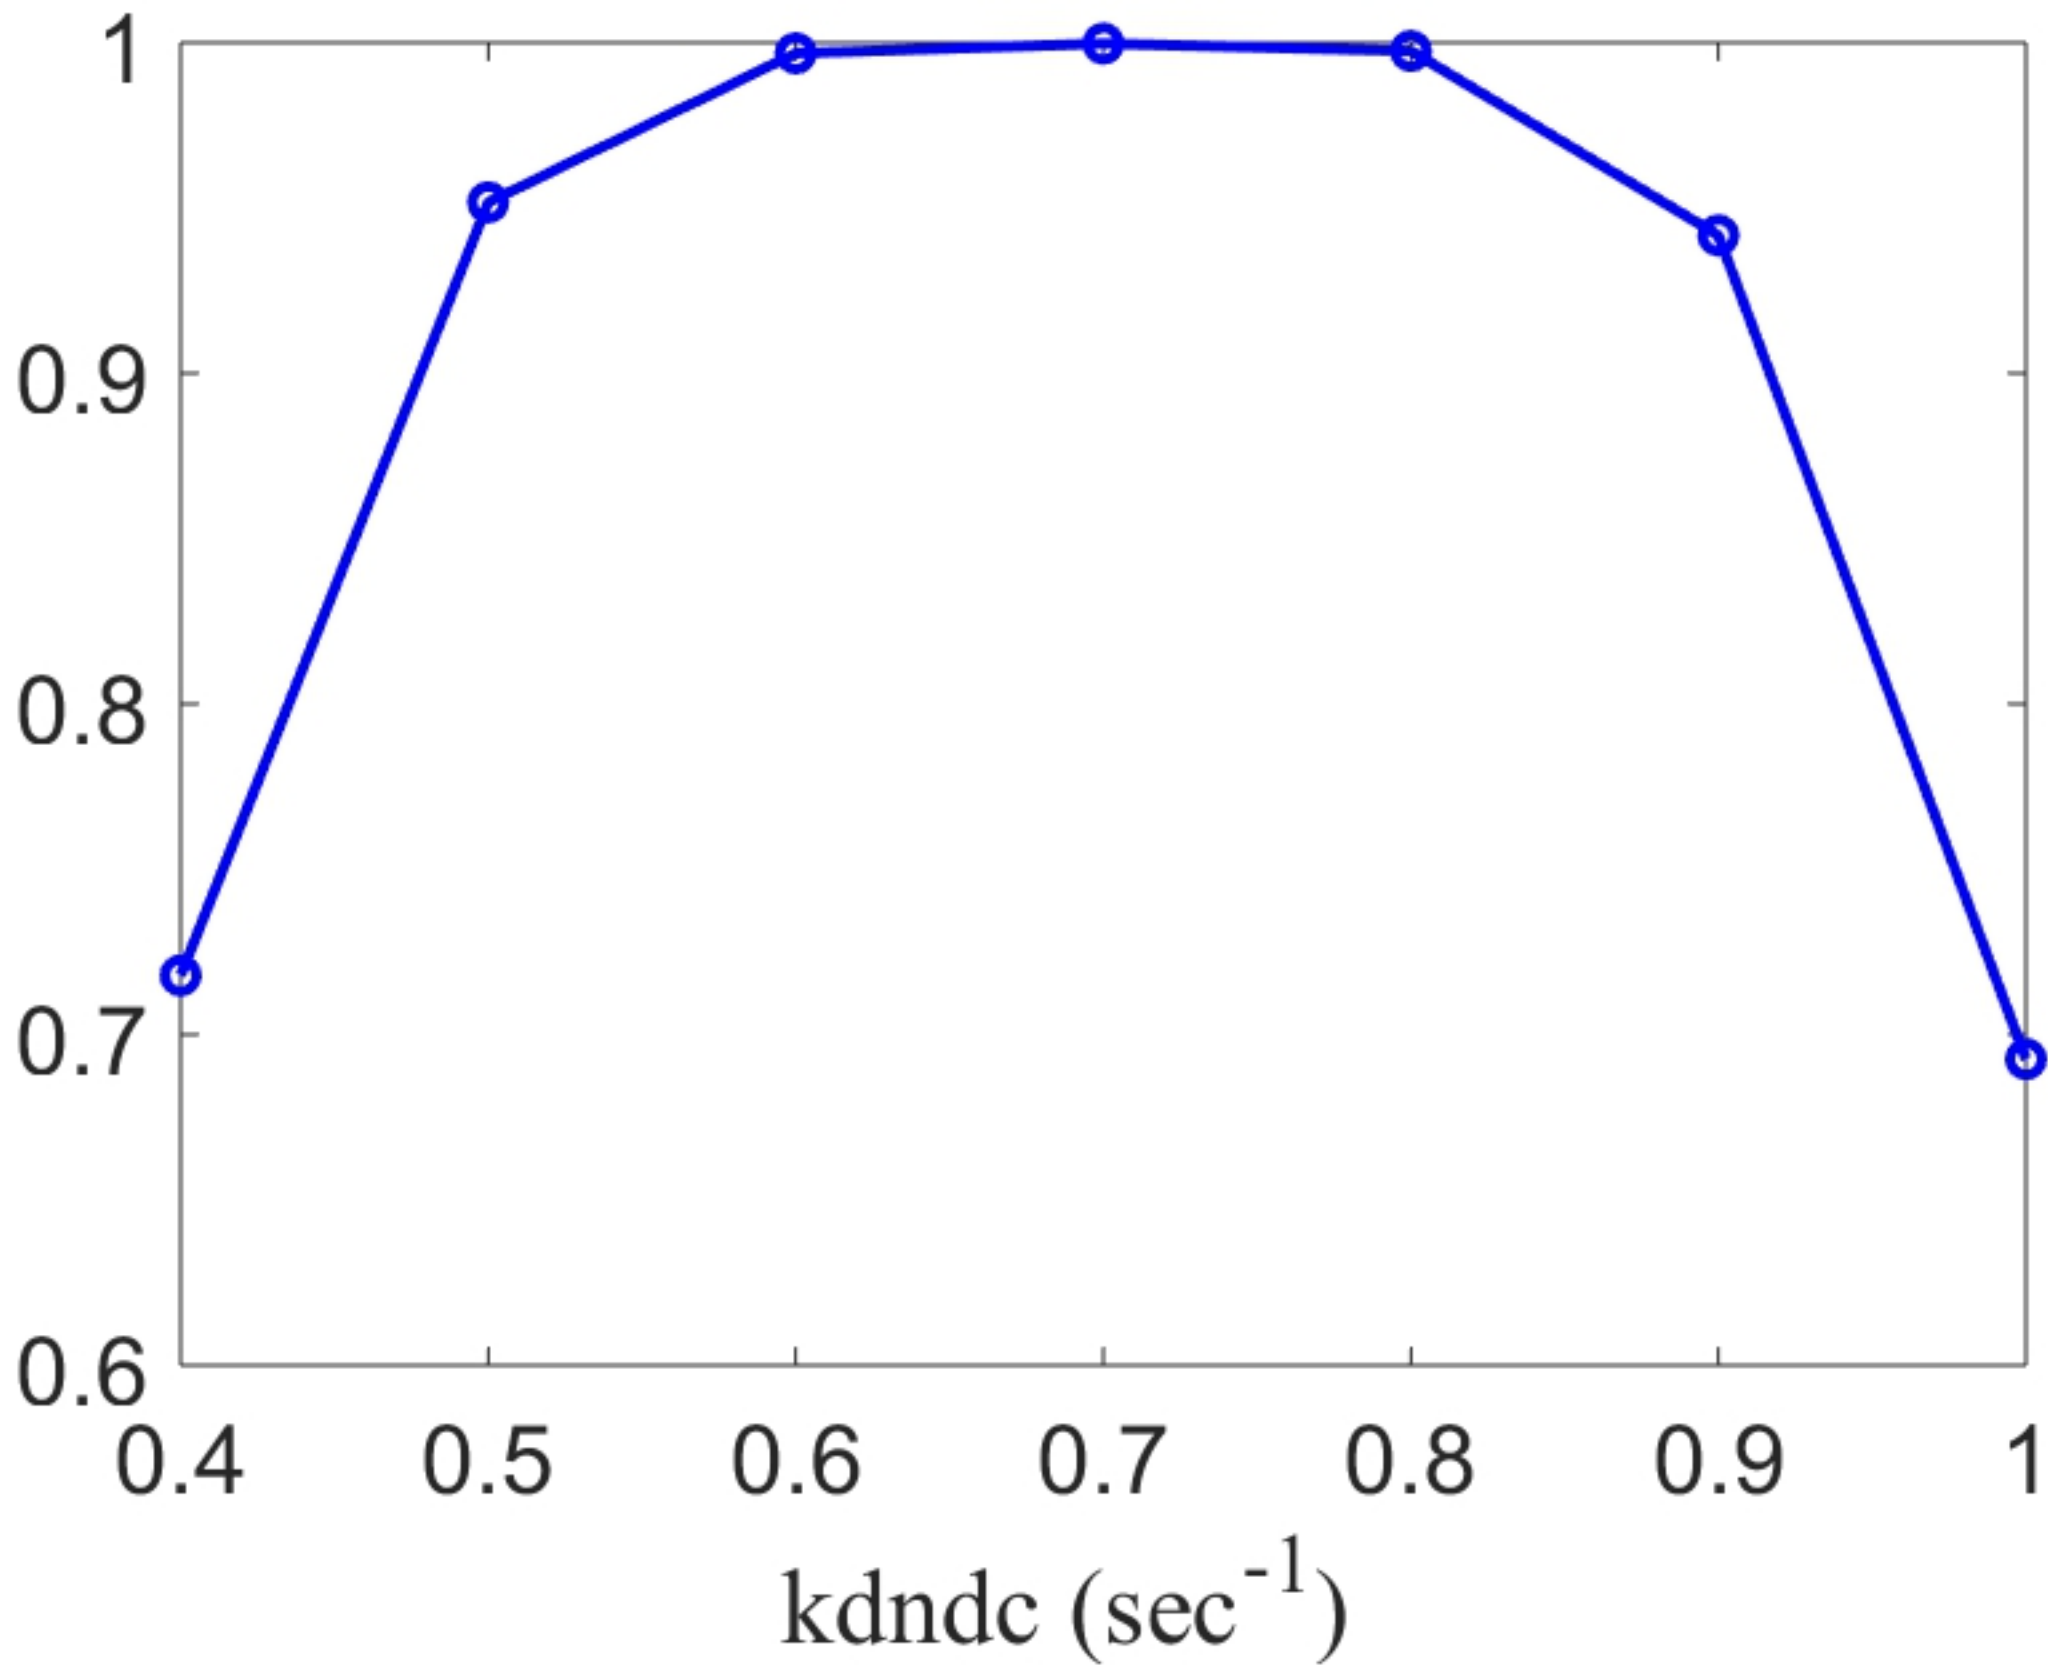

Probability of biorientation

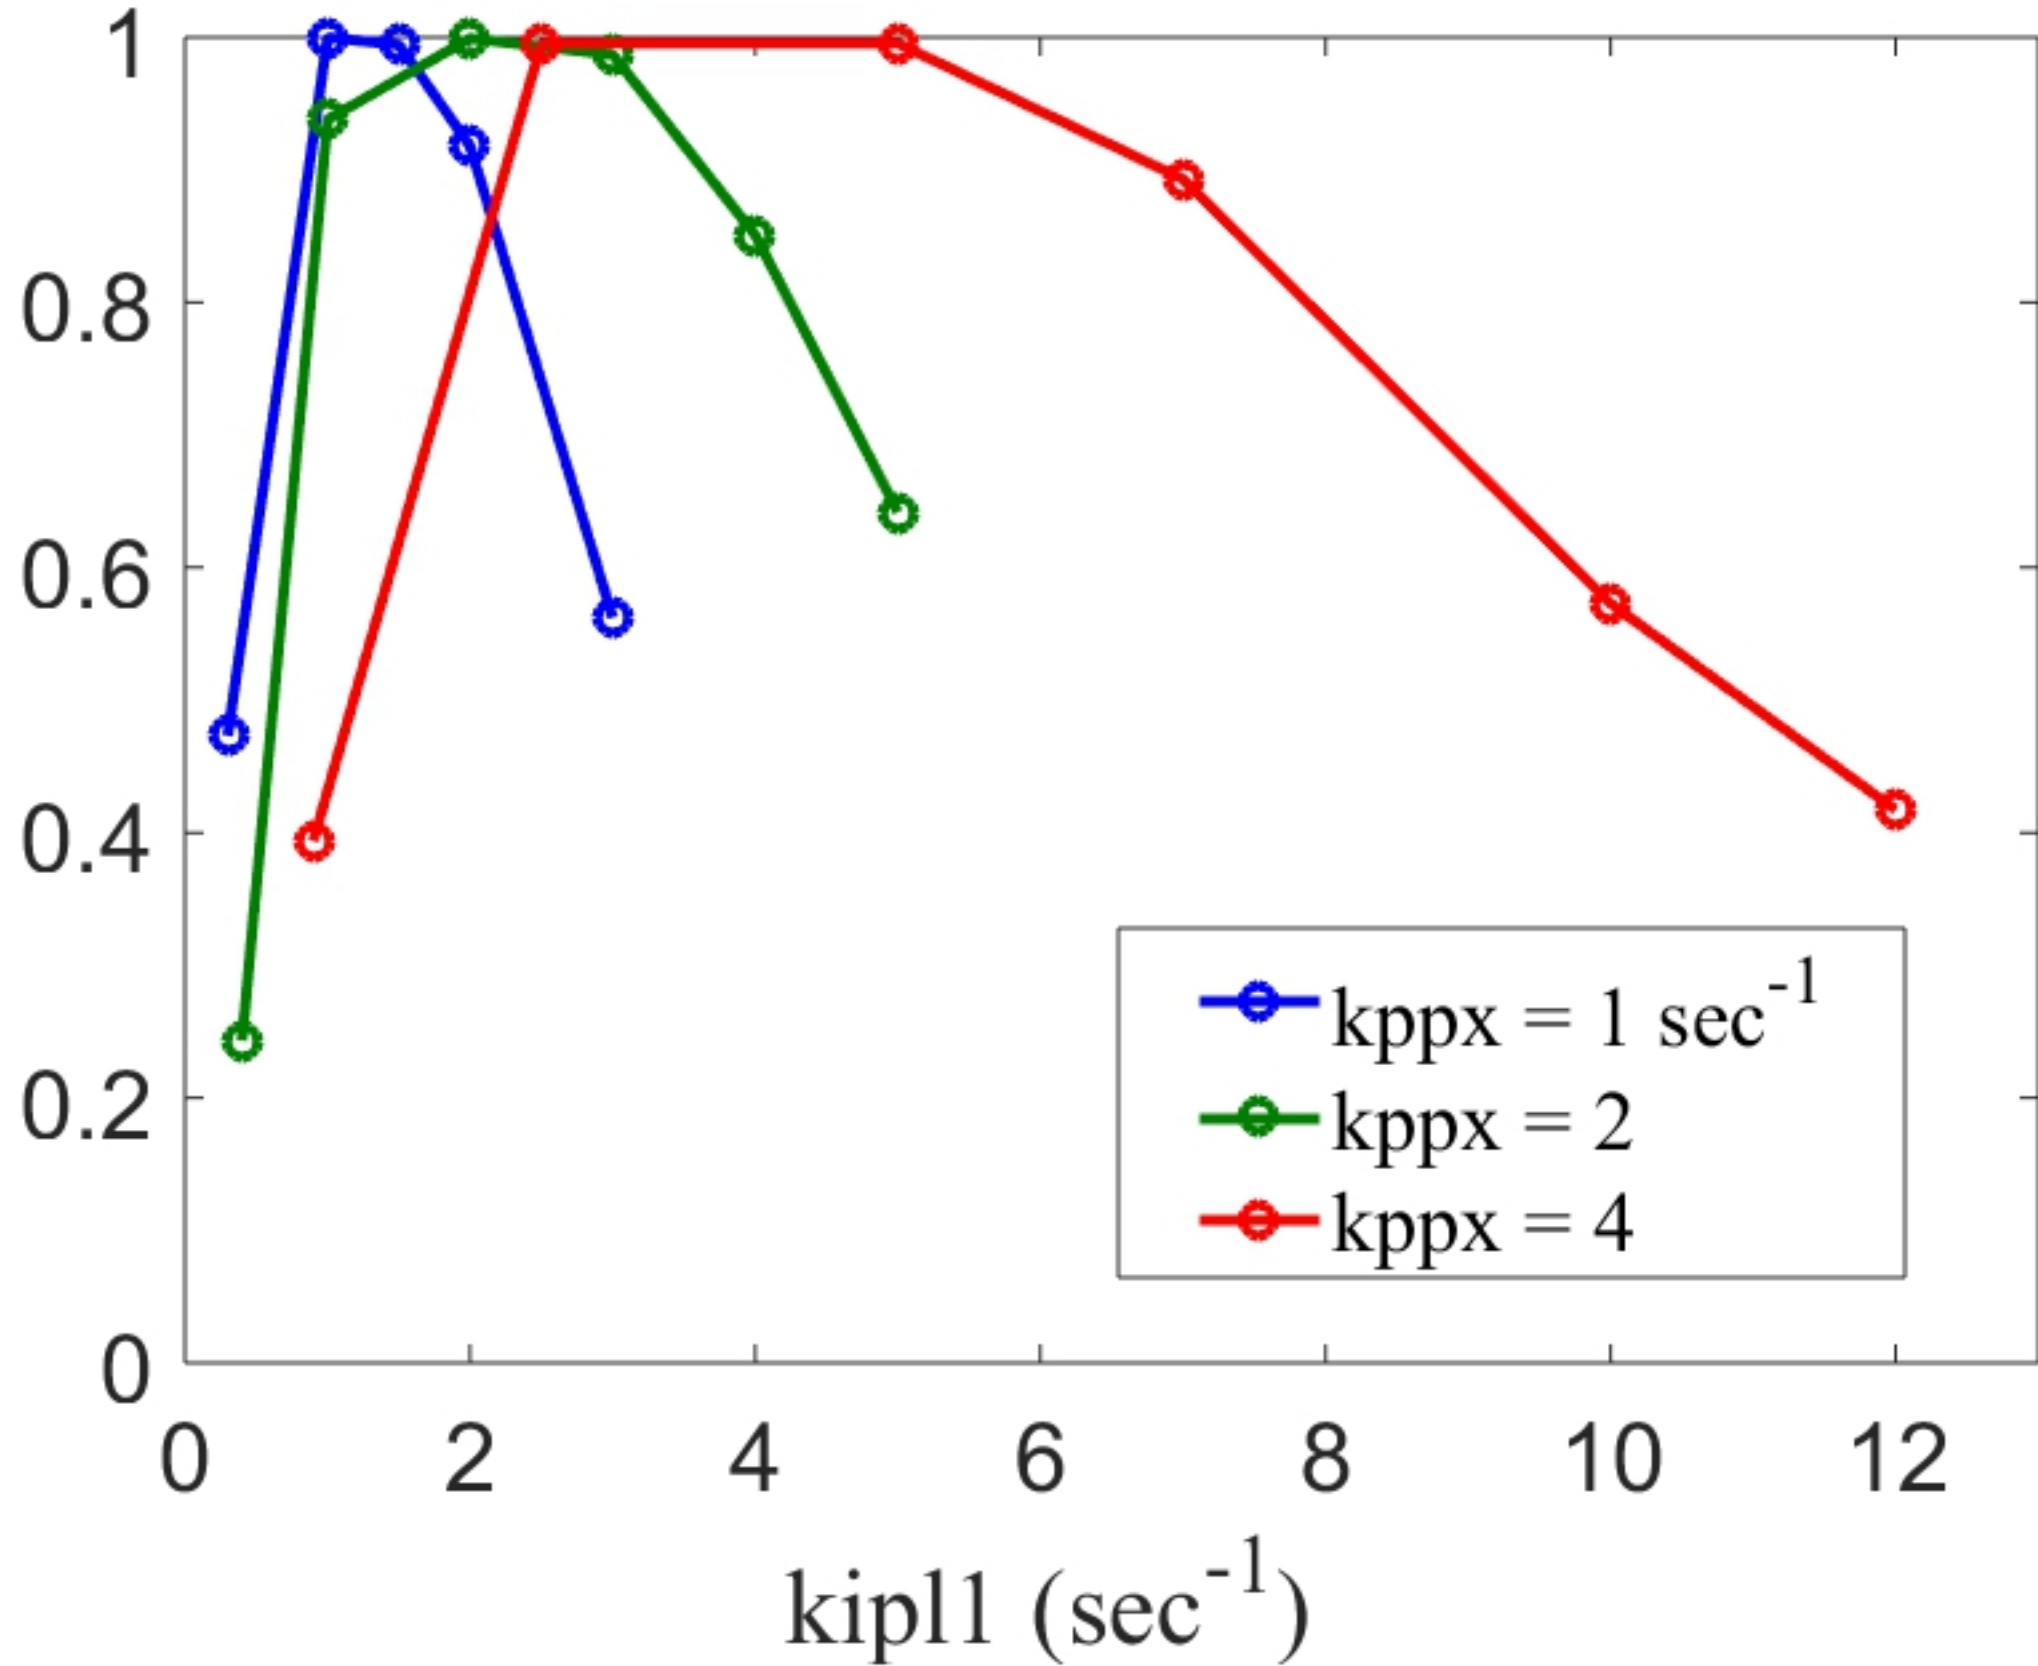



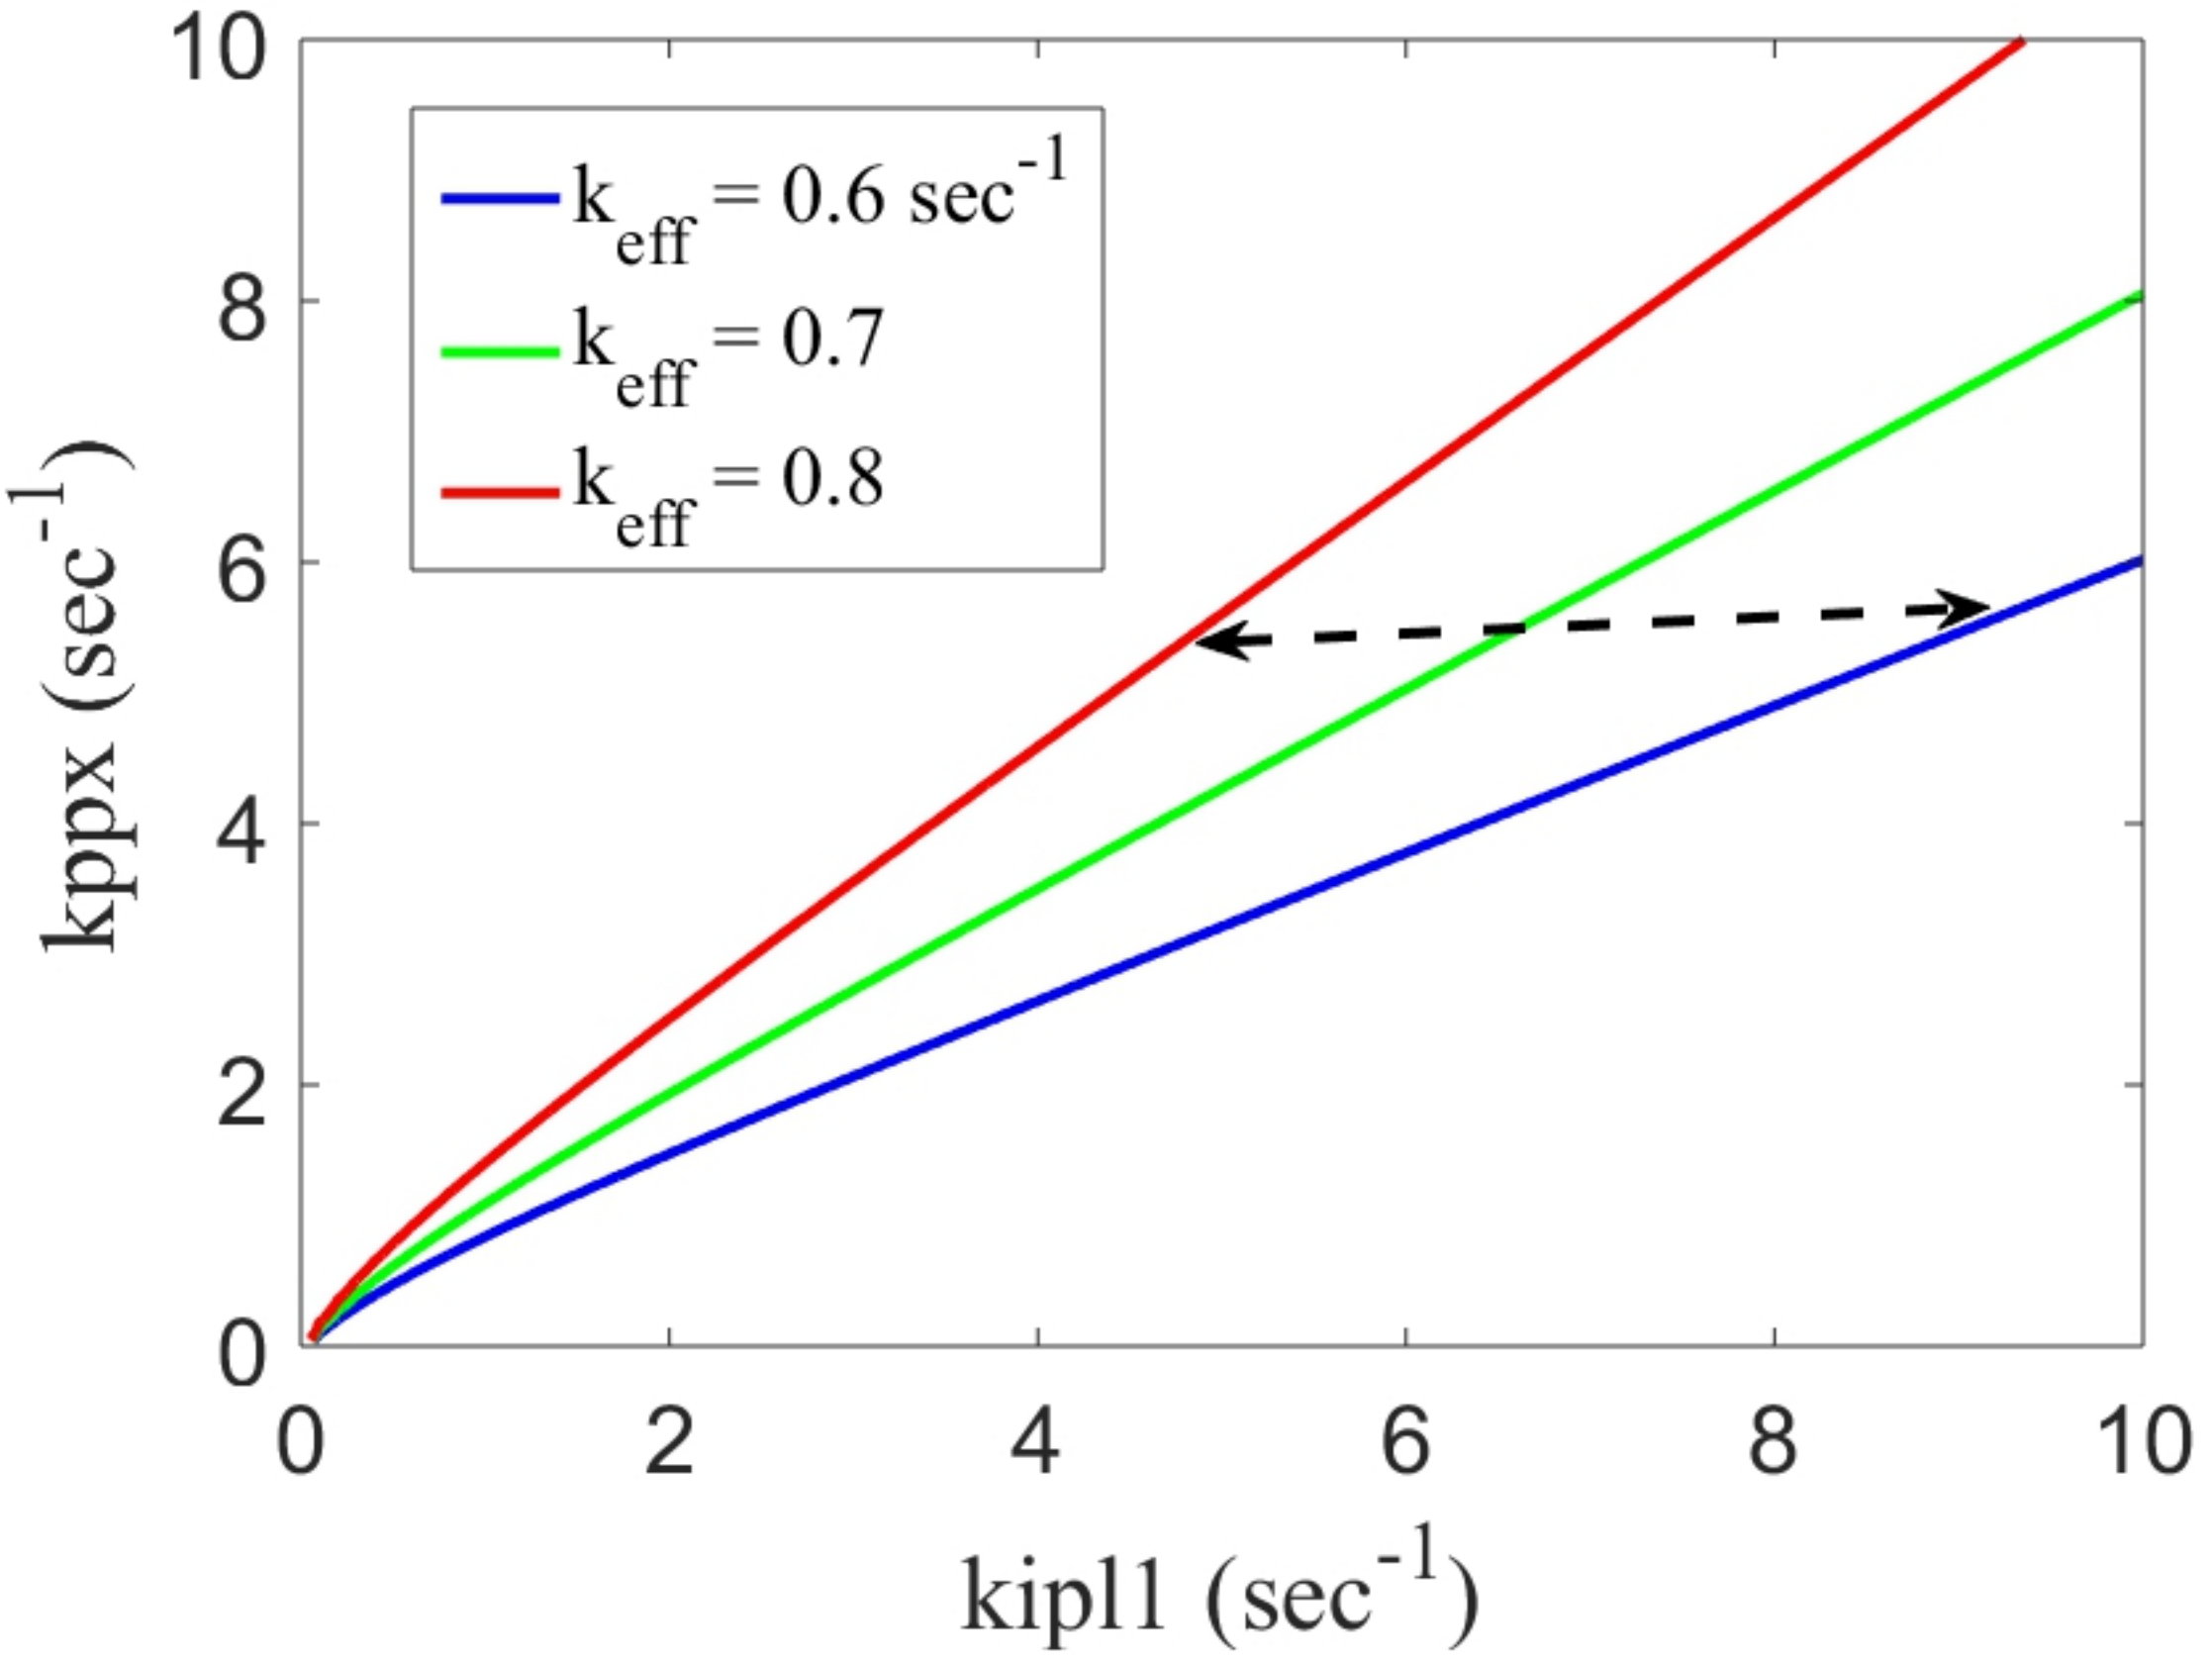

Probability of biorientation

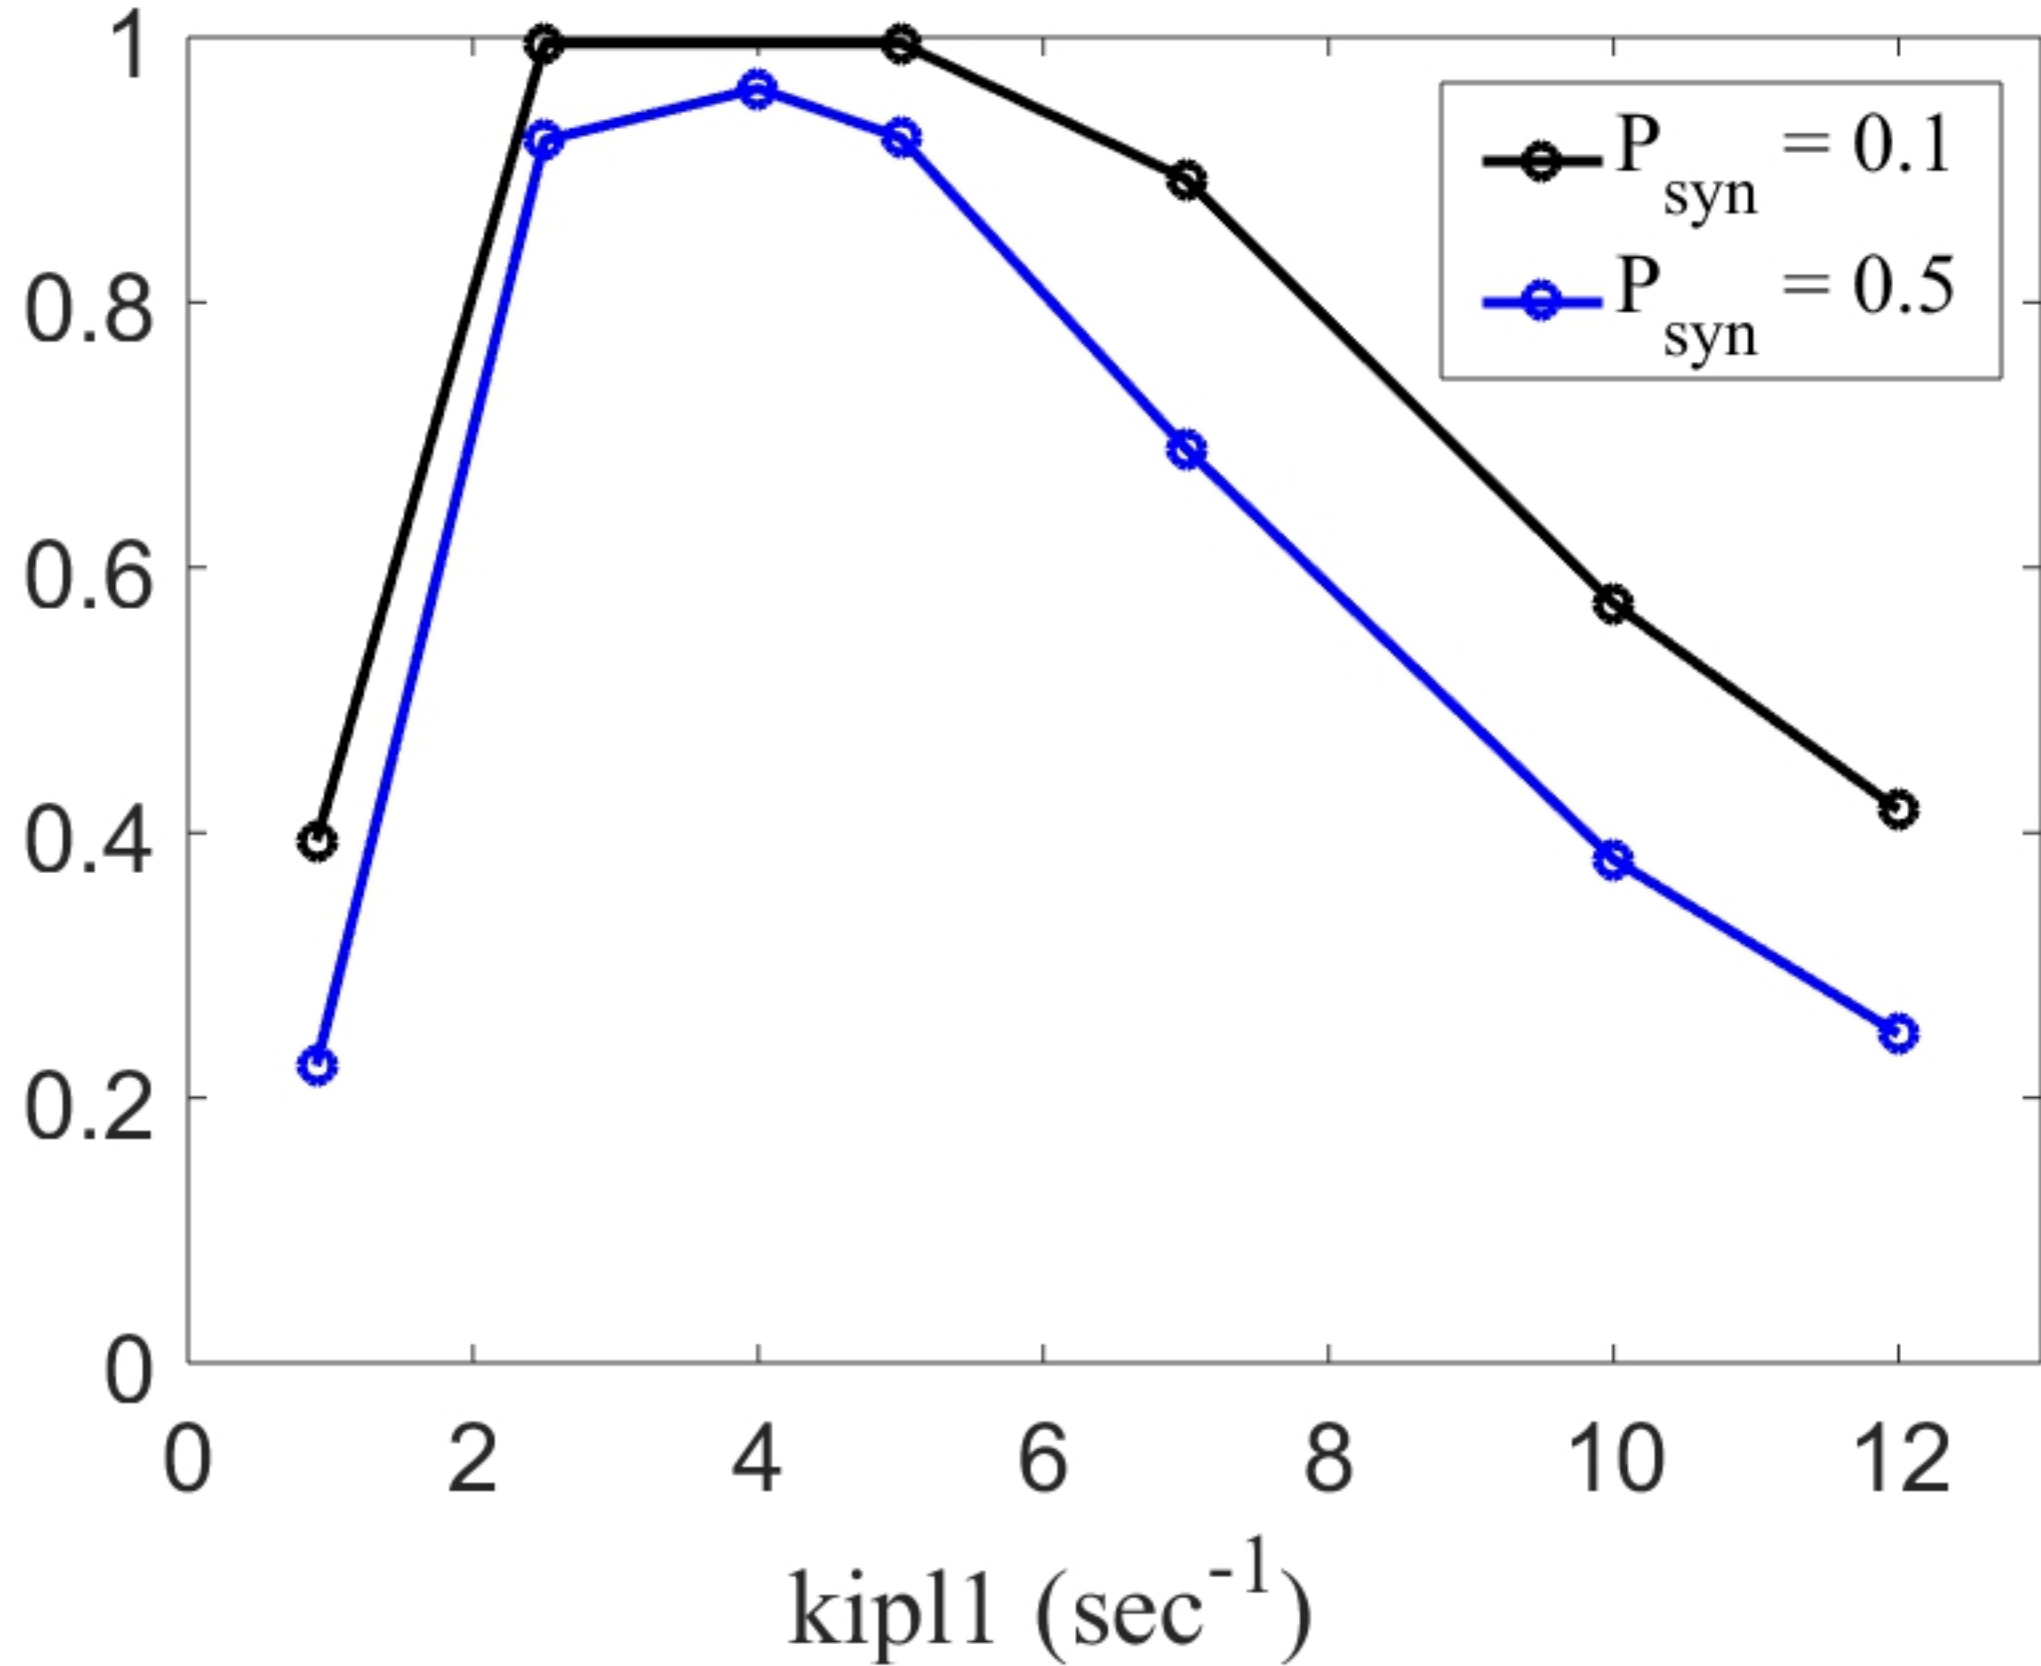

Probability of bioorientation

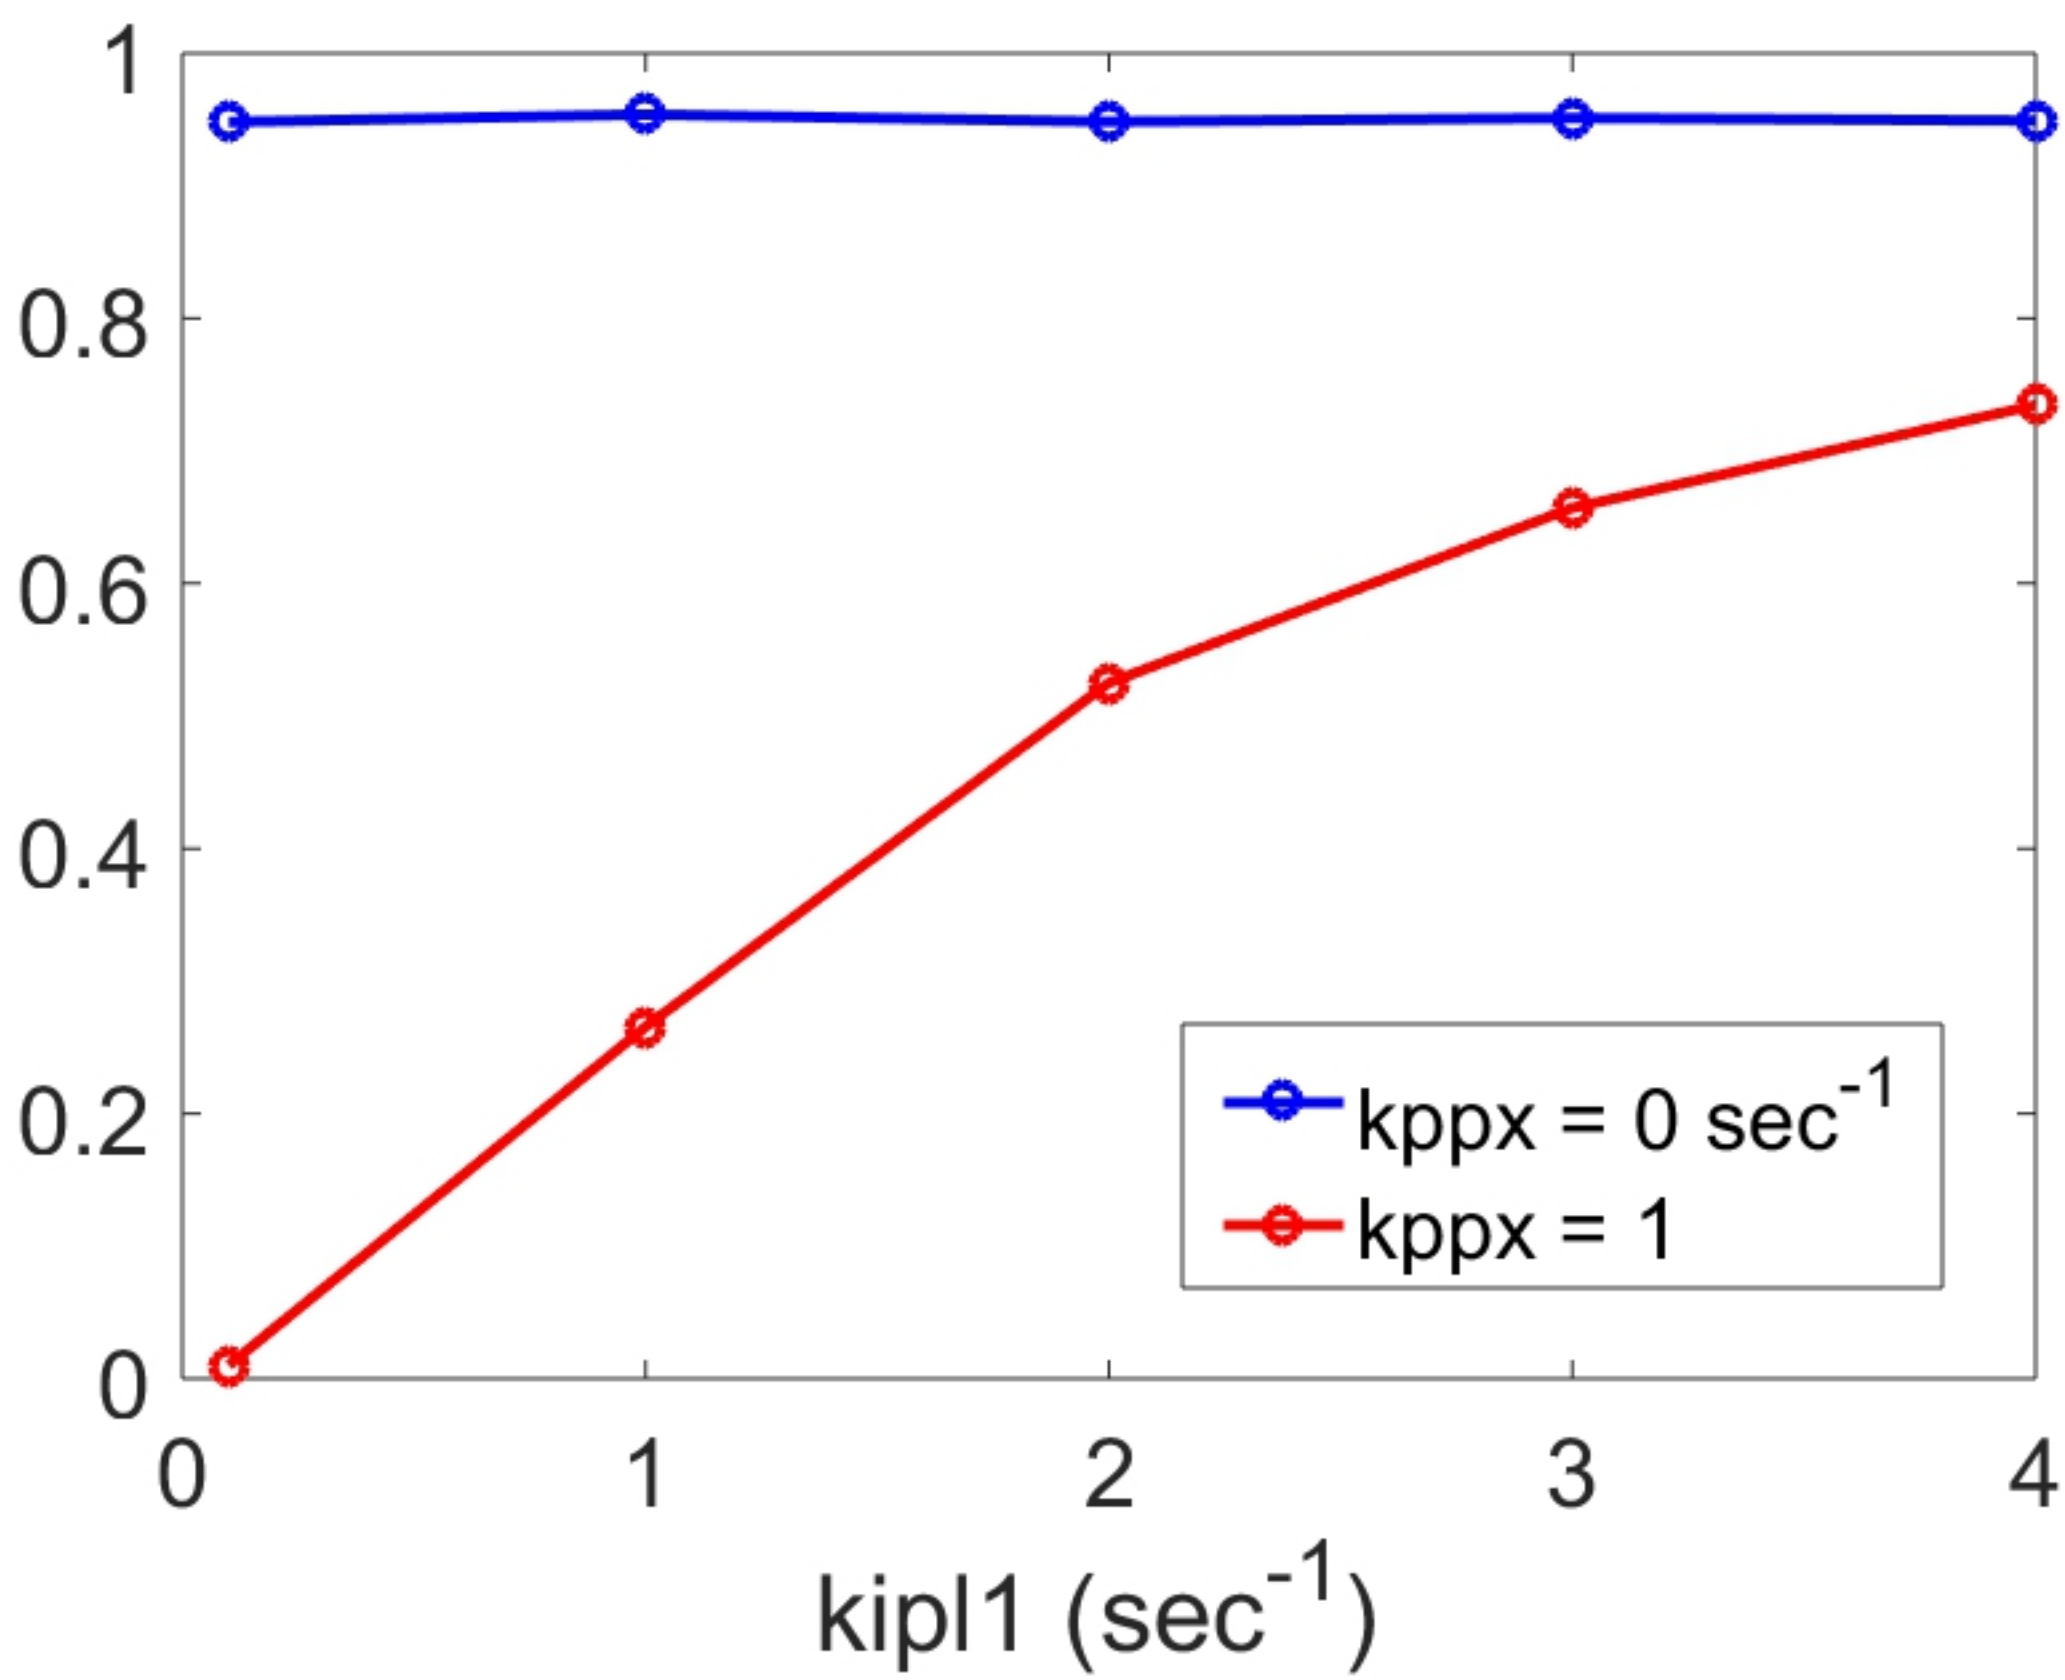

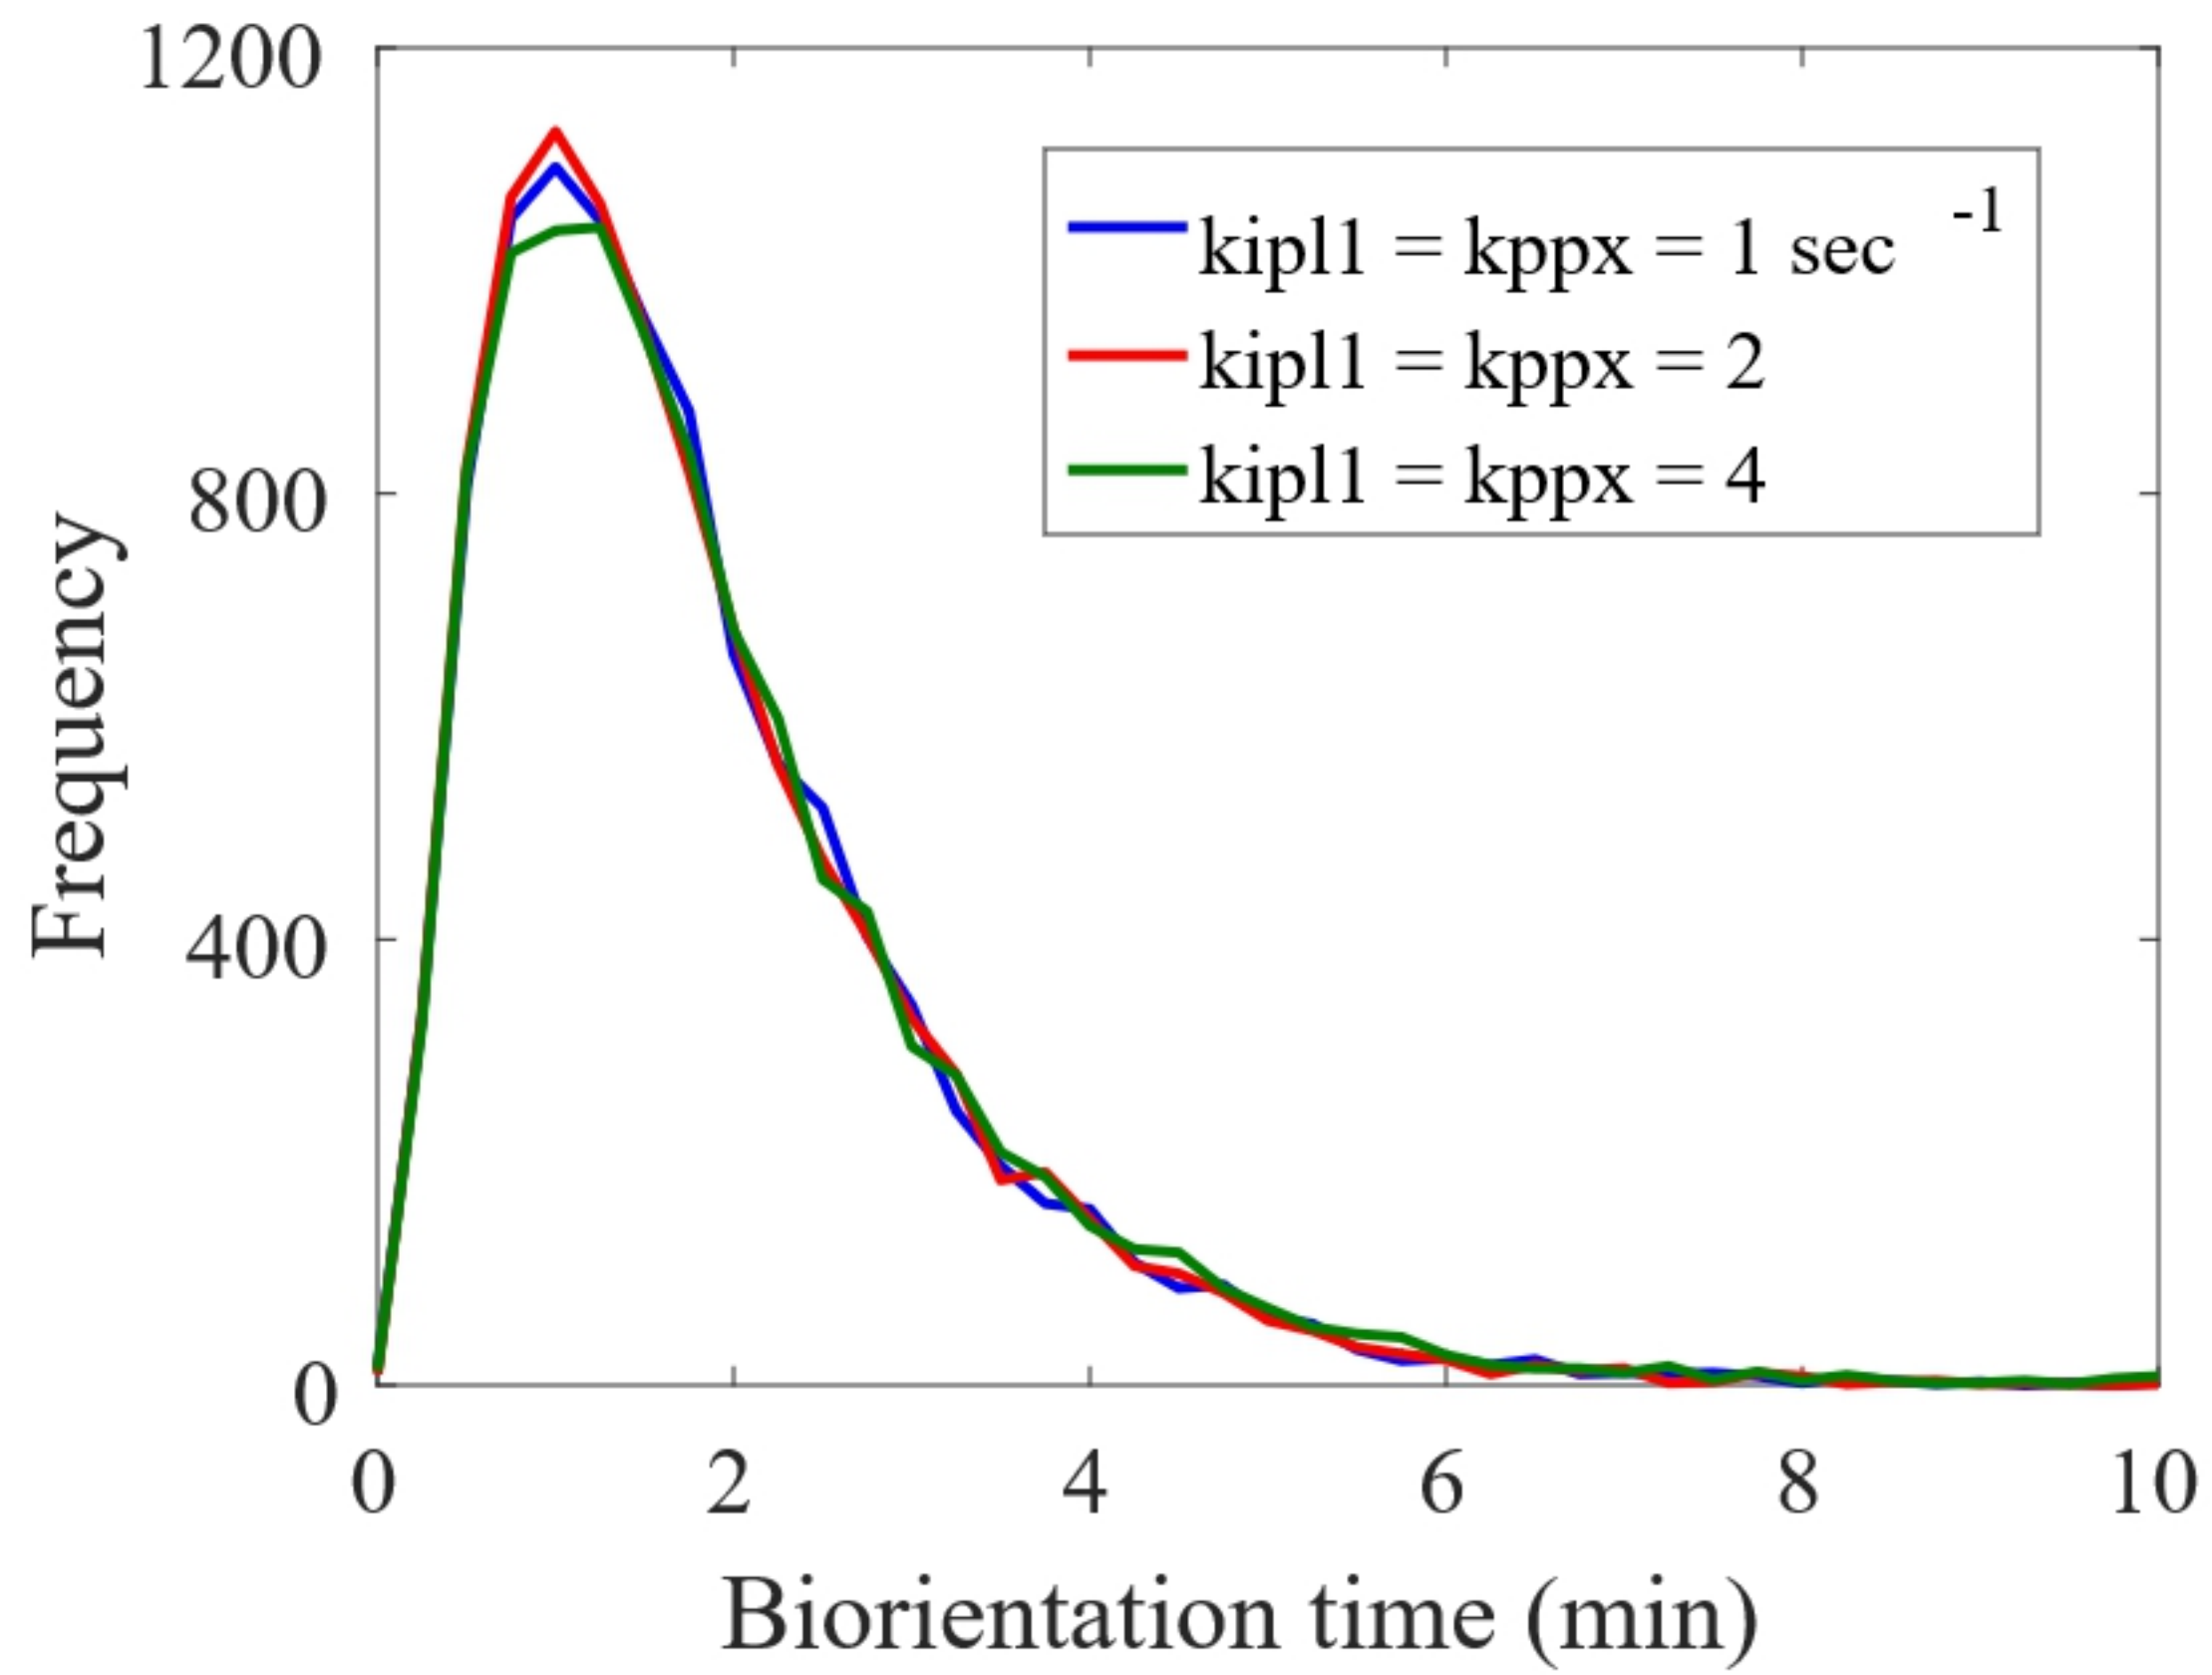

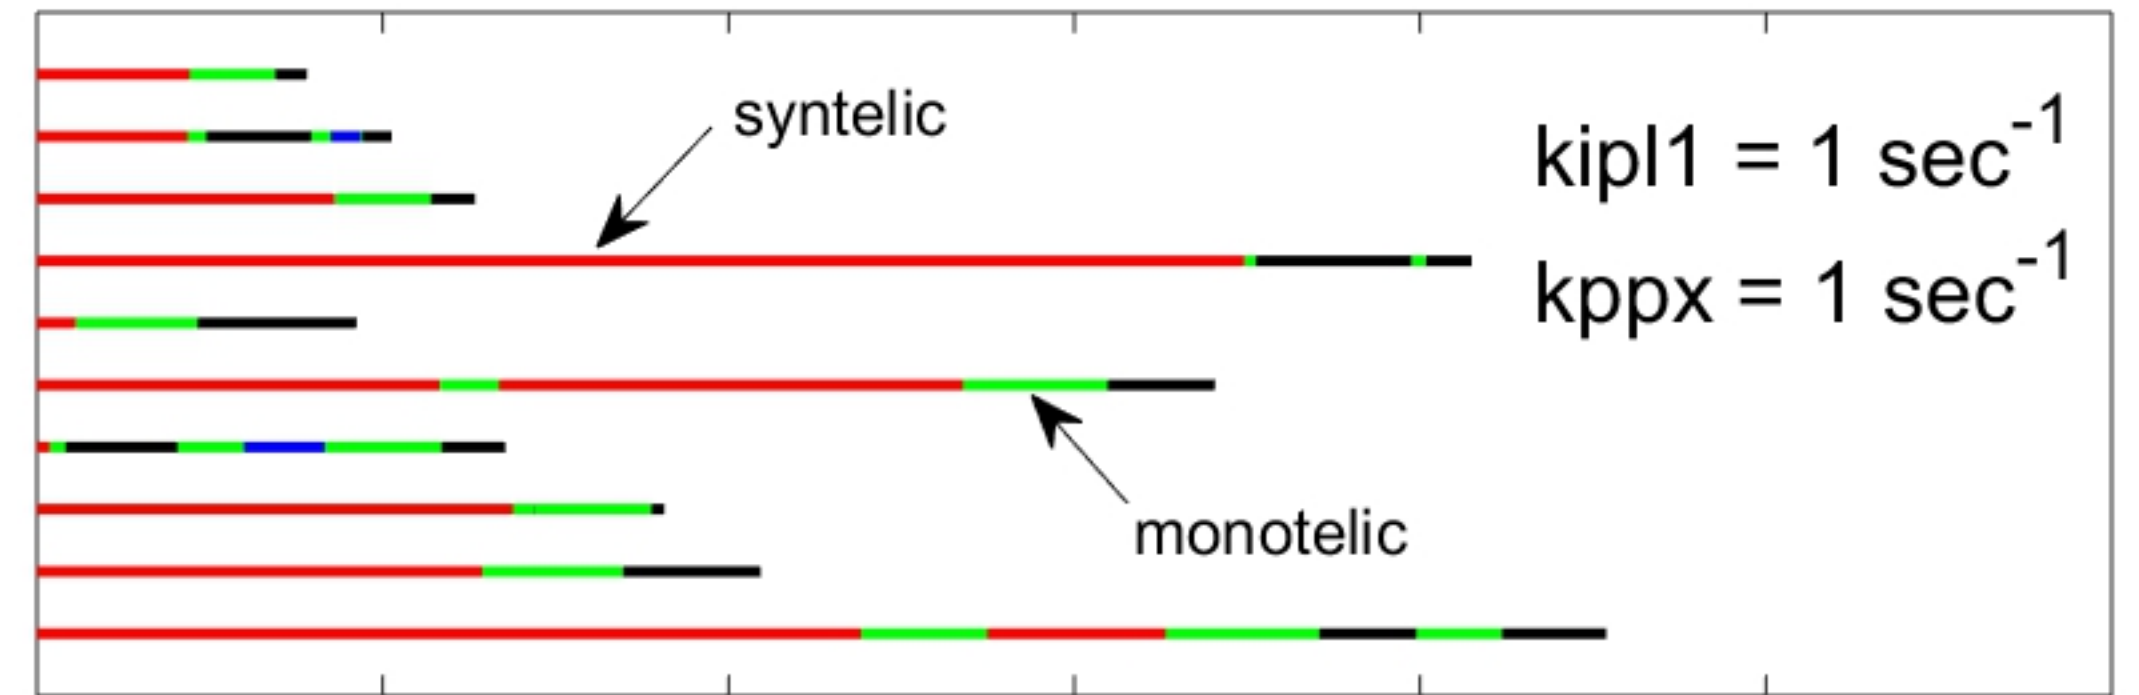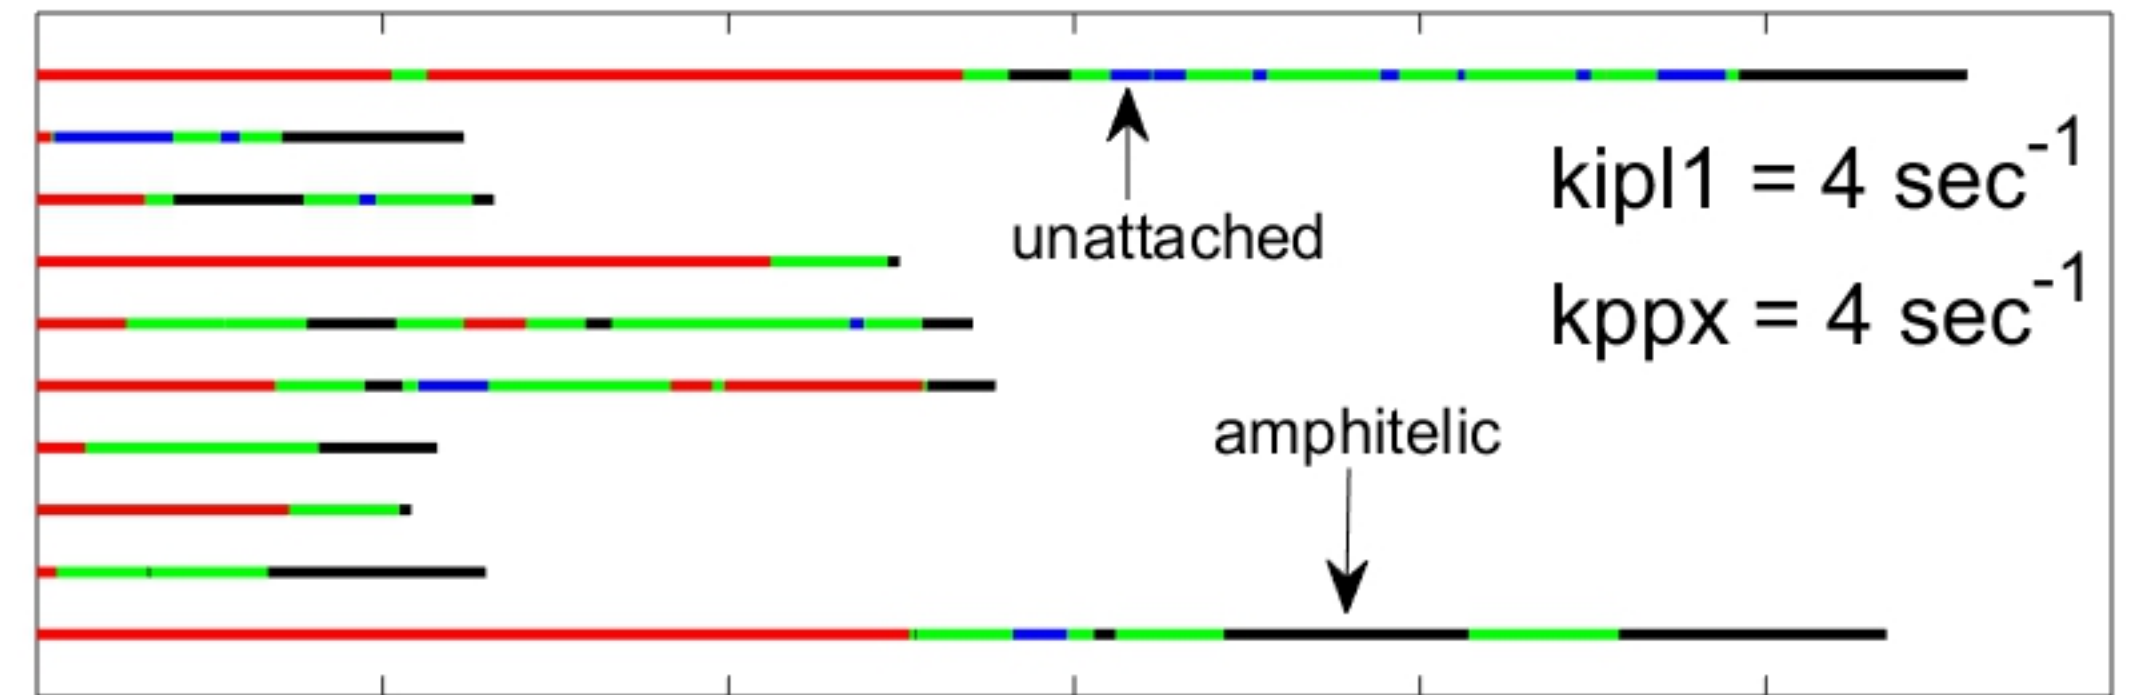

0 1 2 3 4 5 6

Time (min)

P

P
